1

2

### 3 Endocytosis caused by liquid-liquid phase separation of proteins

4

5 Louis-Philippe Bergeron-Sandoval<sup>1</sup>, Hossein Khadivi Heris<sup>2</sup>, Adam G. Hendricks<sup>2</sup>, Allen J.  
6 Ehrlicher<sup>2</sup>, Paul François<sup>3</sup>, Rohit V. Pappu<sup>4</sup> and Stephen W. Michnick<sup>1,5\*</sup>

#### 7 **Affiliations**

8 <sup>1</sup>Département de Biochimie, Université de Montréal, C.P. 6128, Succursale centre-ville,  
9 Montréal, Québec, H3C 3J7, Canada.

10 <sup>2</sup>Department of Bioengineering, McGill University, 817 Sherbrooke St West, Room 270,  
11 Montreal, Quebec, H3A0C3, Canada.

12 <sup>3</sup>Ernest Rutherford Physics Building, McGill University, 3600 University St, Montreal, Québec,  
13 H3A2T8

14 <sup>4</sup>Department of Biomedical Engineering and Center for Biological Systems Engineering,  
15 Washington University in St. Louis, One Brookings Drive, Campus Box 1097, St. Louis,  
16 Missouri 63130, USA.

17 <sup>5</sup>Centre Robert-Cedergren, Bio-Informatique et Génomique, Université de Montréal, C.P. 6128,  
18 Succursale centre-ville, Montréal, Québec, H3C 3J7, Canada.

19

20 \*Correspondence to: S.W.M. ([stephen.michnick@umontreal.ca](mailto:stephen.michnick@umontreal.ca)).

21

#### 22 **Summary**

23

24 Clathrin-mediated endocytosis (CME) underlies intra- and extracellular material trafficking in  
25 eukaryotes, and is essential to protein metabolism, intercellular signaling, membrane remodeling  
26 and other cell regulatory processes. Although CME is usually driven by F-actin polymerization,  
27 membrane invagination can also occur through actin independent mechanisms. Here, we show  
28 that viscoelastic protein condensates that form via liquid-liquid phase separation at the sites of  
29 endocytosis initiation facilitate actin independent CME. The work required to drive membrane  
30 invagination is generated by binding energies of the condensate with the membrane and  
31 surrounding cytosol. Our findings expand the repertoire of functions associated with protein  
32 condensates that form via liquid-liquid phase separation to include their ability to do work at soft  
33 interfaces, thus shaping and organizing cellular matter.

## 34 Introduction

35

36 Evolution has resulted in numerous innovations by which morphogenesis of organisms  
37 occurs within limits imposed by physical and chemical constraints on the underlying biochemical  
38 processes (Darwin 1859, Thompson 1917). One such process is clathrin-mediated endocytosis  
39 (CME) a fundamental mechanism of cell surface membrane receptor turnover and recycling,  
40 nutrient uptake and synaptic vesicle regeneration, among others (Conner and Schmid 2003). The  
41 mechanism of membrane invagination in CME has most convincingly been demonstrated to be  
42 growth of membrane-bound branched actin, however CME has also been shown to occur under  
43 conditions where actin polymerization is absent and the mechanisms by which this happens  
44 remain unclear (Aghamohammadzadeh and Ayscough 2009, Li, Shao et al. 2015). Here, we  
45 demonstrate that membrane invagination can arise from liquid-liquid phase separation  
46 (demixing) of proteins with prion-like domains (PLD) from the cytosol (Fig. 1a). Demixing of  
47 these proteins results in formation of a droplet (or condensate), which, by virtue of its  
48 viscoelastic properties, binds to and deforms plasma membrane and cytosol. Demonstration that  
49 phase separated droplets can perform mechanical work expands the repertoire of known  
50 functions of protein condensates to include the ability to do work at the droplet interfaces.  
51 Similar mechanisms may govern or contribute to other membrane shaping, invagination and  
52 budding processes that are involved in the cellular material uptake, secretion, and cell shape  
53 remodeling.

54

55 In *S. cerevisiae*, the dominant mechanism for vesicle generation in CME is branched actin  
56 assembly, which is required to compete against intracellular turgor pressure and membrane  
57 tension to drive the invagination of the plasma membrane (Carlsson and Bayly 2014, Dmitrieff  
58 and Nedelec 2015). If, however, turgor pressure is eliminated, CME can also occur independent  
59 of actin polymerization (Aghamohammadzadeh and Ayscough 2009, Li, Shao et al. 2015).  
60 Complementary mechanisms have been proposed to explain actin-independent membrane  
61 invagination in CME include intrinsic twisting of the membrane by the clathrin matrix, binding  
62 of curved BAR (Bin/Amphiphysin/Rvs) domain-containing proteins (Yu and Schulten 2013),  
63 protein domain insertion in the membrane bilayer (Ford, Mills et al. 2002), local relief of turgor  
64 pressure (Scher-Zagier and Carlsson 2016), lipid modifications and a reorganization of lipid  
65 bilayers (Anitei, Stange et al. 2017) or steric repulsion of coat and adaptor proteins due to their  
66 crowding (Busch, Houser et al. 2015, Derganc and Copic 2016). Although the possibility of  
67 these mechanisms have been demonstrated *in vitro*, their importance *in vivo* remain unknown  
68 (detailed in Material and Methods) (Boettner, D'Agostino et al. 2009, Carlsson and Bayly 2014,  
69 Kukulski, Picco et al. 2016).

70

71 We investigated an alternative potential mechanism of CME in a yeast cell mutant model in  
72 which turgor pressure is relieved and actin polymerization is specifically inhibited (Fig. 1a, Fig.  
73 S1-2). This potential mechanism was suggested to us by the observation that there is a common

74 amino acid sequence pattern called prion-like domains (PLD) found among coat and adapter  
75 proteins (Fig. 1a) (Alberti, Halfmann et al. 2009, Malinowska, Kroschwald et al. 2013). Such  
76 proteins are known to phase separate *in vitro* and in cells. Phase separation leads to spherical  
77 condensates or droplets that are hundreds of nanometers to micrometers in size with a range of  
78 viscoelastic properties (Guilak, Tedrow et al. 2000, Pappu, Wang et al. 2008, Brangwynne,  
79 Eckmann et al. 2009, Hyman, Weber et al. 2014, Banjade, Wu et al. 2015, Jiang, Wang et al.  
80 2015, Kroschwald, Maharana et al. 2015, Molliex, Temirov et al. 2015, Nott, Petsalaki et al.  
81 2015, Zhang, Elbaum-Garfinkle et al. 2015). The idea that membranes can be deformed by  
82 liquid-liquid phase separation of droplets is supported by *in vitro* evidence of membrane  
83 nanotubes formed by displacement of small polymer droplets contained within giant  
84 phospholipid bilayer membrane vesicles (Li, Lipowsky et al. 2011). We postulate that such  
85 droplets exist at CME initiation sites and that, owing to their viscoelastic properties and  
86 interfacial tension, bind to the plasma membrane adaptors and generate a force that drives  
87 invagination of the membrane (Hertz 1882, Johnson 1971, Style, Hyland et al. 2013).

88

### 89 **PLD-containing CME proteins accumulate and phase separate at cortical sites**

90

91 Evidence that a protein droplet (henceforth called the cortical droplet) could form at CME sites  
92 include first, electron and light microscopic studies that reveal a region surrounding CME  
93 membrane invaginations and mature vesicles of ~200 nm diameter that are devoid of ribosomes  
94 (Kukulski, Schorb et al. 2012, Picco, Mund et al. 2015). This “exclusion zone” thus appears to  
95 present a physical barrier to large molecular complexes at least as large as ribosomes (> 10 nm)  
96 (Kukulski, Schorb et al. 2012). Furthermore, we and others have observed an object at cortical  
97 sites of ~200 nm diameter by super-resolution imaging of the endocytic coat protein Sla1 in cells  
98 treated with Latrunculin A (Lat A), an inhibitor of actin polymerization. Therefore, the exclusion  
99 zone cannot be attributed to F-actin bundles (Fig. 1b, Fig. S3) (Picco, Mund et al. 2015). Our  
100 results agree with quantitative immuno-EM data which show that many endocytic coat proteins  
101 (including Sla1/2 and Ent1/2) are located in a space of similar dimensions, consistent with a  
102 protein droplet that associates with the membrane on cortical sites (Idrissi, Grotsch et al. 2008,  
103 Idrissi, Blasco et al. 2012).

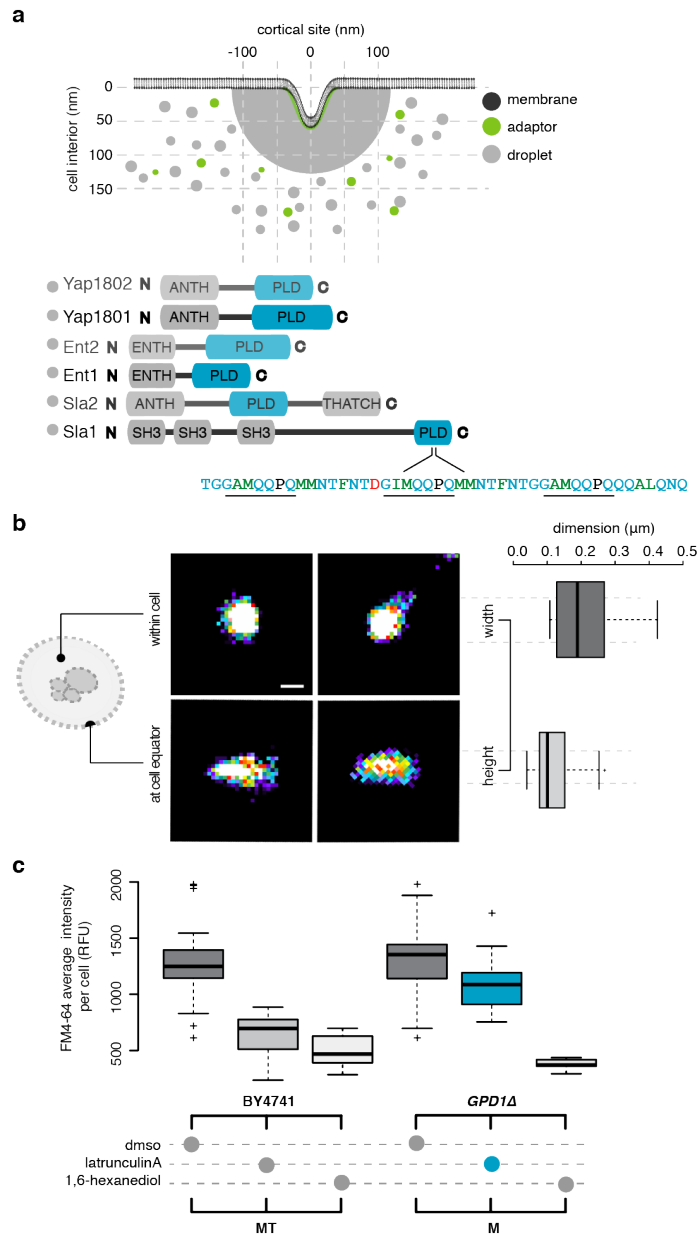

104  
105

106 **Figure 1 | Assembly of proteins into a cortical droplet drives clathrin-mediated endocytosis** (a)  
 107 (Upper panel) Illustration of the geometry of a plasma membrane (dark grey) invagination into the cell  
 108 during clathrin-mediated endocytosis (CME). 70 nm invagination is required for vesicle scission to occur.  
 109 Electron microscopic data suggest that clathrin-coated plasma membrane patches are surrounded by a  
 110 cortical body of ~200 nm diameter (light grey) before appearance of actin structures. Clathrin heavy and  
 111 light chains (Chc1 and Clc1) interact with adaptor proteins (Edel1 and Syp1) to form a lattice on the  
 112 membrane (in green). Subsequently, early coat proteins (light grey), such as Sla1/2, Ent1/2, and  
 113 Yap1801/2, directly bind to the adaptor-clathrin lattice and form the cortical body (in grey). (lower panel)  
 114 Coat proteins contain “Prion-like domains” (PLD, in blue) that include tandem repeats of asparagine and  
 115 glutamine. (b) Geometry and size distribution of coat protein Sla1-GFP at cortical sites measured using  
 116 super-resolution microscopy (dSTORM). Lateral x, y resolution was ~10 nm. Pseudo-color reconstructed

117 images show circular structures (left panels) when viewed from the top, or within cells (left, upper), but  
118 form narrow ellipses when imaged at the equator of cells (left, lower). Automatic segmentation and  
119 morphological analysis (right) were performed on these reconstructed images to determine the width ( $209$   
120  $\pm 10$  nm) and height ( $118 \pm 6$  nm) of cortical bodies (mean  $\pm$  sd;  $n = 250$ ), consistent with other electron  
121 and light micrographic evidence. (c) Lipophilic cargo membrane-labelling dye FM4-64 is taken up into  
122 vesicles by CME in wild type BY4741 (left) and *GPD1* $\Delta$  cells (eliminates turgor pressure; right) treated  
123 with either DMSO, latrunculin A (prevents F-actin polymerization) or 1,6-hexanediol (disrupts liquid-  
124 liquid phase separated protein droplets). Each boxplot (center line, median; box, upper and lower  
125 quartiles; whiskers, 1.5x IQR; crosses, outliers) shows the relative fluorescence units of  $n = 50$  cells. Note  
126 that *GPD1* $\Delta$  cells can undergo CME in the absence of F-actin polymerization (blue) because there is no  
127 turgor pressure in these cells (Fig. S1-2).

128  
129 The simple alcohol 1,6-hexanediol (HD) has been demonstrated to prevent liquid-liquid phase  
130 separation of proteins *in vivo* and *in vitro* (Updike, Hachey et al. 2011, Kroschwald, Maharana et  
131 al. 2015, Mollieux, Temirov et al. 2015, Wheeler, Matheny et al. 2016). CME, as measured by  
132 cell uptake of a lipophilic membrane-bound fluorescent dye (FM4-64), was inhibited by HD,  
133 whether or not turgor pressure and actin polymerization were present (Fig. 1c, left *versus* right  
134 panels, respectively). Furthermore, an HD dose-response of uptake of the fluorescent dye  
135 (Lucifer Yellow) into vacuoles and formation of puncta monitored as Sla1-GFP fluorescence at  
136 cortical sites were prevented, but not in cells treated with the related alcohol 1,2,3-hexanetriol  
137 that does not disrupt droplets (Fig. 2a, Fig. S4). The other PLD-containing proteins, including  
138 Sla2, Ent1, Ent2, Yap1801 and Yap1802, all failed to form puncta in cells treated with HD (Fig.  
139 S4). Pulse-chase experiments showed that HD-dependent dissolution of Sla1 puncta was  
140 reversible (Fig. S5 and Movie S1). Finally, PLD-containing proteins can also form amyloid  
141 aggregates, which can be diagnosed by binding and co-localization of Thioflavin T (ThT) to the  
142 aggregates (Khurana, Coleman et al. 2005). We observed no colocalization of ThT with Sla1-  
143 mCherry-labelled puncta (Fig. S6).

144  
145 The PLDs of cortical CME proteins were essential to their localization to cortical sites (Fig. 2b).  
146 Furthermore, CME was significantly reduced in cells where the PLDs of Sla1 and Ent1 were  
147 deleted and with substitutions of proline for other residues in the Sla1 PLD, which weakens the  
148 driving force for phase separation (Fig. 2c, Fig. S7) (Toombs, McCarty et al. 2009, Crick, Ruff et  
149 al. 2013). Our results support evidence that there is a functional redundancy among most of the  
150 PLD-containing proteins with the two that are more essential, perhaps required for specific  
151 functions mediated by other domains within their sequences (Watson, Cope et al. 2001).

152

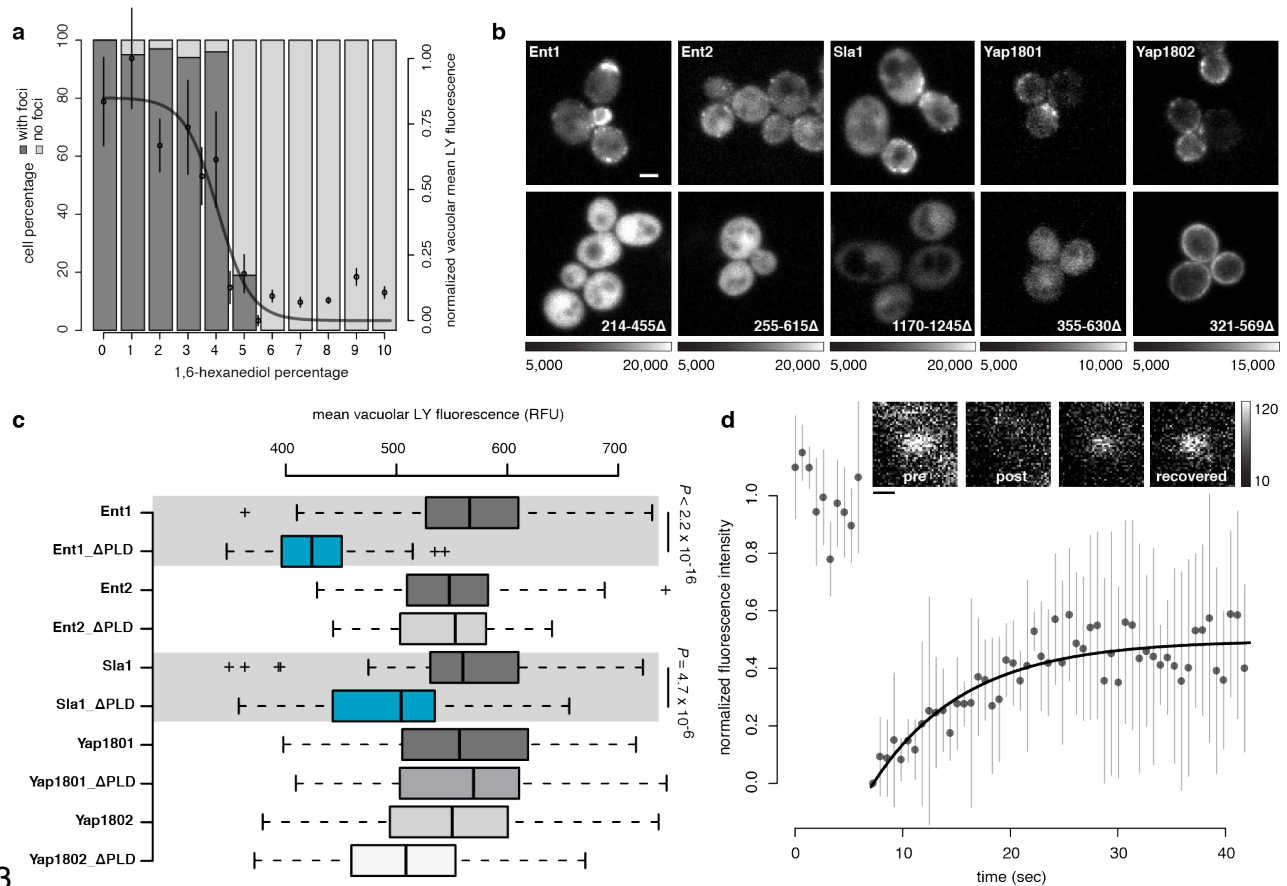

153  
154

155 **Figure 2 | CME adaptor and coat proteins phase separate to form droplets** (a) 1,6-hexanediol (HD),  
 156 disrupts cortical droplets in an all-or-none manner. Barplot shows percentage of cells that contain Sla1-  
 157 GFP foci (dark grey), or not (light grey), as a function of HD concentration monitored by counting  
 158 fluorescent puncta containing Sla1-GFP at cortical sites 5 minutes after HD treatment ( $n = 150$  cells). Plot  
 159 overlay (in black) shows quantification of lucifer yellow fluorescent dye uptake in CME vesicles (mean  $\pm$   
 160 sd;  $n = 25$  foci; logistic fit) (b) Prion-like domains (PLDs) are essential for localization of proteins to the  
 161 cortical sites. Fluorescence images of cortical localization of Ent1, Ent2, Sla1, Yap1801 and Yap1802  
 162 fused to Venus YFP. Localization of full-length (upper panels) *versus* C-terminal PLD truncation mutants  
 163 of the proteins (lower panels). Amino acid positions of the deleted PLDs are indicated for respective  
 164 images. Grayscale dynamic range for image pairs are indicated below. Scale bar, 2  $\mu\text{m}$ . (c) Quantification  
 165 (box center line, median; box limits, upper and lower quartiles; whiskers, 1.5x IQR; crosses, outliers) by  
 166 fluorescence microscopy of lucifer yellow dye uptake for strains that express either full-length or PLD-  
 167 truncated Ent1, Ent2, Yap1801, Yap1802 and Sla1 (as detailed in panel b). We observed a significant  
 168 decrease in CME for PLD truncation mutants of Sla1 and Ent1 ( $n = 100$  cells; two-sided t-test; see  
 169 Material and Methods). (d) Coat proteins exchange with cortical droplets at rates typical of those  
 170 observed for proteins that compose other protein droplets. Fluorescence recovery after photo bleaching  
 171 (FRAP) of Sla2-GFP, GFP signal recovery was measured within a segmented Sla1-mCherry region of  
 172 interest to ensure that FRAP was acquired within the cortical droplet (mean  $\pm$  sd;  $n = 10$  cells. Data was  
 173 fitted to a single term recovery equation (full line) (Material and Methods). Incomplete fluorescence  
 174 recovery suggests that cortical droplets are viscoelastic. Representative foci images before bleaching,



175 upon bleaching, and after recovery are shown in inserts. 8-bit grayscale values, 10 to 120. Scale bar, 250  
176 nm.

177

178 The interactions among proteins in liquid-liquid phase separated droplets are expected to be  
179 weak and this is assessed by their rapid exchange within and between droplets and their  
180 surroundings (Brangwynne, Eckmann et al. 2009, Elbaum-Garfinkle, Kim et al. 2015, Lin,  
181 Protter et al. 2015, Feric, Vaidya et al. 2016). In fluorescence recovery after photobleaching  
182 (FRAP) experiments we measured equivalent mobile and immobile fractions ( $0.50 \pm 0.02$ ; mean  
183  $\pm$  sem) for the protein Sla2 and a rapid recovery time ( $5.96 \pm 1.15$  seconds; mean  $\pm$  sem) (Fig.  
184 2d), similar to other protein and nucleic acid droplets including the dense internal fibrillar  
185 component of *X. laevis* nucleoli (Feric, Vaidya et al. 2016). Taken together, these results support  
186 the hypothesis that the cortical bodies are phase separated viscoelastic droplets. We next set out  
187 to determine the material properties of the cortical droplets and to test our postulate that their  
188 binding to the plasma membrane generates the force that drives invagination of the membrane.

189

### 190 **Cortical droplets can mechanically deform both cytosol and membrane**

191

192 We hypothesized that free energy released by cortical droplet phase separation is converted into  
193 mechanical work to deform the membrane and the cytosol. This mechanical work is manifested  
194 as an inward pressure on the membrane created by expansion of the droplet and the requirement  
195 that volume of the droplet is conserved. Phenomena where geometric organization of matter is  
196 driven by the balances of opposing forces have been described at subatomic up to stellar scales,  
197 examples of which include “fingering instabilities” (Kull 1991, Hester 2008, Xi, Byrnes et al.  
198 2017).

199

200 The mechanics of CME can be described by analogy to a soft viscoelastic and sticky balloon  
201 bound to a soft elastic sheet (Fig. 4a, Movie S2). If you stuck your finger through the center of  
202 the sheet-balloon interface to create an invagination, the surface area of the balloon would have  
203 to increase to maintain the volume and density of the balloon constant. Equally, but in an inverse  
204 sense, if you were to grasp the sticky surface of the balloon with your hands and pull outwards  
205 equally over the surface, except at the elastic sheet-balloon interface, a tiny increase of the  
206 surface area would require a compensating adjustment of the shape so that the balloon keeps a  
207 constant volume. Since force is being applied outwards everywhere except at the sheet balloon  
208 interface, it is here that an invagination of the membrane-balloon interface would compensate for  
209 the pressure generated by the outward force on the balloon surface.

210

211 In the case of CME, the grasping force is caused by binding of molecules at the cortical droplet-  
212 cytoplasm interface. Balance between this binding and elastic deformation energies is achieved  
213 when the membrane invaginates. This idea is captured in a simple phenomenological model  
214 expressed as the sum of mechanical strain energy ( $\phi$  term) and work ( $\psi$  term), respectively;

215

216 
$$U \sim \phi \cdot \delta^{1+\varepsilon} - \psi \cdot \delta ; \quad (1)$$

217

218 Here,  $U$  is the mean-field energy,  $\delta$  is the invagination depth of both the membrane and cytosol  
219 (which are coupled to each other by virtue of conservation of volume of the droplet) and the  
220 exponent  $\varepsilon > 0$  reflects the deformation geometry (Material and Methods). Close to equilibrium  
221 (as  $\partial U/\partial \delta$  approaches 0) we expect invagination to balance the two contributions so that  $\delta^*$   
222 minimizes energy in (1) resulting in,

223

224 
$$\delta^* = \left( \frac{\psi}{\phi (1 + \varepsilon)} \right)^{\frac{1}{\varepsilon}} ; \quad (2)$$

225

226 Equation (2) shows that the invagination depth  $\delta$  is determined by the ratio  $\psi/\phi$  and the  
227 deformation geometry  $\varepsilon$ . Values of  $\phi$  and  $\psi$  can be determined as functions of individual  
228 geometries, elasticities, and viscosities of cytosol, droplet and membrane and interfacial tensions  
229 among them (Material and Methods). These in turn can be determined by super-resolution  
230 imaging (geometries) and elastic and viscous moduli, taken from the literature or determined by  
231 active micro-rheology experiments as described next.

232

233 We used active rheology to determine the material properties of the cytosol in which cortical  
234 droplets are embedded and then, because the droplets are too small to probe directly, we  
235 calculated their properties through well-understood relationships between the properties of  
236 materials in contact and their resulting geometries, as described below. Specifically, we used  
237 optical tweezers to examine the frequency-dependent amplitude and phase responses of  
238 polystyrene beads that are embedded in cells (Fig. 3a, Material and Methods). 200 nm diameter  
239 polystyrene beads were integrated into cells by osmoporation (Fig. S8) (da Silva Pedrini, Dupont  
240 et al. 2014). Measurements of passive diffusion of the beads showed mean square displacements  
241 (MSD) close to that of random mechanical noise caused by vibration of the microscope (Fig.  
242 S8). Furthermore, we established that the osmoporation procedure did not affect rheological  
243 properties of cells by measuring the MSD of expressed viral capsid microNS particles labeled  
244 with GFP in untreated or osmoporated cells and showing that their diffusion behaviors were  
245 identical (Fig. S9) (Munder, Midtvedt et al. 2016).

246

247 For active rheology experiments, we used an acousto-optic device to oscillate the position of the  
248 optical trap in the specimen plane at frequencies over four orders of magnitude and measured the  
249 displacement of trapped beads from the trap center using back focal plane interferometry (Fig.  
250 3b). We could thus measure the viscoelastic properties of the cytosol surrounding the beads by  
251 measuring their phase and amplitude response to the oscillations of the optical tweezers. Then by  
252 calculating the power spectrum of unforced fluctuations of the bead we obtained storage ( $G'$ ) and



253 loss ( $G''$ ) moduli as a function of frequency (Fig. 3c-d, Fig. S10, Material and Methods) (Fischer,  
254 Richardson et al. 2010, Hendricks and Goldman 2017).

255

256 In addition to obtaining quantities essential to calculate material properties of the cytoplasm and  
257 droplet, active rheology combined with spatiotemporal dynamics of interacting materials can  
258 inform of their structures. The mechanical properties of living cells can be compared to that of  
259 the popular children's toy "Silly Putty" (Cross 2012). Like this material, cells and underlying  
260 structures show different mechanical properties depending on the rates at which forces are  
261 applied to them (Hendricks, Holzbaaur et al. 2012, Guo, Ehrlicher et al. 2013, Guo, Ehrlicher et  
262 al. 2014). If a force is applied at a low velocity, the cell behaves like a viscous fluid; flowing and  
263 taking on whatever shape it is forced into. When a force is applied at higher velocity, however,  
264 the material behaves like an elastic object, bouncing back to its original shape. As we discuss  
265 below, these behaviors reflect the manner and strengths with which the molecules that make up a  
266 material interact with each other and their environment.

267

268 In specific terms, the material properties of the yeast cytoplasm and its interactions with the  
269 cortical droplet could be interpreted from the complex modulus versus frequency plot as follows  
270 (Fig. 3d). The inflection of the  $G'$  modulus at 2 Hz results in similar  $G'$  and  $G''$  values at low  
271 frequencies, which indicates that the cytosol is more viscous near rest. When deformed by the  
272 droplet growth (at a velocity of growth =  $2360 \pm 120 \text{ nm s}^{-1}$ ; corresponding to a stress at  $\sim 30 \pm 2$   
273 Hz) the cytosol is more elastic, whereas membrane invagination occurs at a rate at which the  
274 cytoplasm is more viscous (a velocity of  $7.4 \pm 2.5 \text{ nm s}^{-1}$ ; corresponding to  $0.1 \pm 0.04 \text{ Hz}$ ) (Fig.  
275 1b, 3d, Fig. S11). The  $G'$  and  $G''$  we measured are similar to the cytoplasm of adherent  
276 mammalian cells and indicate that the beads are confined within a dense network of interacting  
277 molecules (Hendricks, Holzbaaur et al. 2012, Guo, Ehrlicher et al. 2013, Guo, Ehrlicher et al.  
278 2014).

279

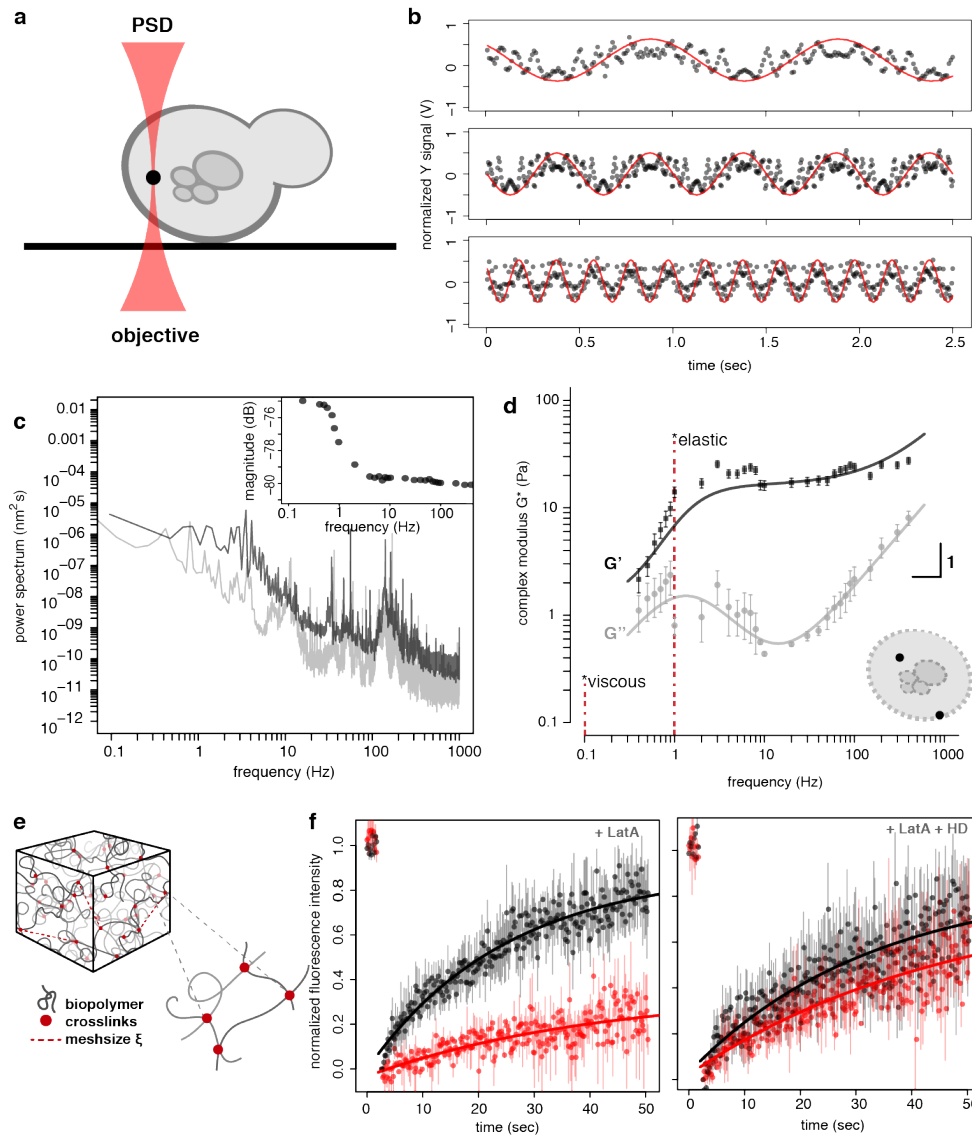

280  
281

282 **Figure 3 | Cytosol and cortical droplets are composed of a viscoelastic amorphous network of**  
 283 **interacting proteins** (a) We used optical tweezers (red beam between the microscope objective and a  
 284 position sensitive detector (PSD) coupled to an acousto-optic device (AOD) to oscillate polystyrene beads  
 285 in cells. Two pulses of osmotic shock were used to osmoporate 200 nm polystyrene beads (black) into Lat  
 286 A-treated haploid yeast *GPD1Δ* cells. (b) PSD output signal in volts (V) as a function of time for  
 287 acquisitions made at 1Hz (top), 2 Hz (middle) and 5 Hz (bottom). A bead, located in the cell periphery,  
 288 was oscillated with the AOD in the Y-axis of the specimen plane with fixed tweezer movement amplitude  
 289 (normalized red curve) at different frequencies. The recorded PSD raw traces (black points) were also  
 290 normalized to a corresponding magnitude range (coherence cutoff of 0.9). (c) Power spectrum of the  
 291 oscillated bead (black) with magnitude of response as a function of frequency (insert). (d) Decomposition  
 292 of  $G^*$  as a function of frequency into  $G'$  (storage modulus; darker squares) and  $G''$  (loss modulus; light  
 293 shade circles) for beads distributed at both the cell periphery and interior (see schematic insert; mean  $\pm$   
 294 sd;  $n = 17$  cells) with an average trap stiffness  $k_{\text{trap}}$  (mean  $\pm$  se;  $8.0 \times 10^{-5} \pm 2.7 \times 10^{-5} \text{ N m}^{-1}$ ) and

295 photodiode sensitivity factor  $\beta$  (mean  $\pm$  se;  $10.7 \times 10^3 \pm 2.3 \times 10^3 \text{ nm V}^{-1}$ ). Data was fitted to a model of  
296 an entangled and crosslinked network of flexible polymers (Material and Methods; Eq. 2.9-2.10). Dashed  
297 lines indicate frequency range for more viscous or more elastic behavior. (e) 3D illustration and zoom-in  
298 of the latticework composed of amorphous protein chains (grey filaments) with the binding sites (red  
299 dots) through which they are non-covalently associate and the mesh size (dashed red line). (f)  
300 Fluorescence recovery after photo bleaching (FRAP) of fluorescent dye (FITC)-conjugated dextran of  
301 10.4 nm within a Syp1-mCherry focus (red) or neighbouring cytosolic regions without Syp1 signal  
302 (black) in either Lat A-treated (left panel) or Lat A and HD-treated *GPD1Δ* Syp1-mCherry cells (right  
303 panel). Data points represent mean normalized fluorescence recovery (mean  $\pm$  SEM; n = 10 cells). Values  
304 for distinct dextran-FITC sizes and cell region were fitted to a single term recovery equation (Material  
305 and Methods).

306  
307 We could now determine the mechanical properties of the cortical droplet as follows. First, our  
308 data are consistent with both cortical droplets and cytosol behaving as predominantly elastic  
309 materials (Fig. 3d). Classic Hertz theory relates contact geometries of elastic materials to their  
310 mechanical properties. We could thus, use the geometry of the cortical droplets determined in  
311 our super-resolution imaging experiments, and the moduli of the cytosol in which they are  
312 embedded to estimate the cortical droplet elastic modulus to be 59 Pa (Fig. 1b, 3d, Material and  
313 Methods; Eq. 3.7-3.10) (Hertz 1882). These results are consistent with protein condensates that  
314 form elastic materials (Reichheld, Muiznieks et al. 2017) and suggest that the cortical droplets  
315 have similar material properties as the surrounding cytosol, which has an elastic (or Young's)  
316 modulus of 45 Pa at 1 Hz (Material and Methods). We estimated the average mesh size and  
317 permeability of the cortical droplets by probing them with fluorophore-conjugated dextran  
318 molecules of 2.4, 5.8, and 10.4 nm in size. We measured FRAP and colocalization of these  
319 dextran molecules with either Sla1-mCherry or Syp1-mCherry puncta (Fig. 3e-f, Fig. S12-13).  
320 Both 2.4 nm and 5.8 nm dextran-FITC recovered equally in the droplet and cytosolic zones. In  
321 contrast, the 10.4 nm dextran-FITC molecules scarcely permeate the PLD-rich protein network  
322 in the droplet whereas they are mobile in the neighbour cytosol. If cortical droplets are dissolved  
323 by addition of 1,6-hexanediol, we observe equivalent mobility of 10.4 nm dextran-FITC between  
324 cortical sites, labelled with the protein Syp1-mCherry, which is membrane-bound at cortical  
325 patches in an HD-resistant manner, and neighboring cytosol (Fig. 3f, Fig. S13). These results are  
326 consistent with an exclusion zone for ribosomes as discussed above and with exclusion of  
327 dextrans by known protein-RNA phase separated droplets called P granules (Updike, Hachey et  
328 al. 2011, Kukulski, Schorb et al. 2012, Wei, Elbaum-Garfinkle et al. 2017).

329

### 330 **Cortical droplet binding to cytosol provides the energy to drive membrane invagination**

331

332 The deformation of the membrane in response to contact with a soft object depends on the  
333 geometries and mechanical properties of the object and the vessel it is in (in our case the cytosol  
334 of a cell) and the membrane (Fig. 4a). Evidence from electron and super-resolution fluorescence  
335 microscopy indicate that the favored geometry of the membrane is flat with invagination

336 centered in the middle of the droplet (Fig. 4a, lower). Such geometries could be explained by a  
337 local radial stress-gradient generated by the droplet adhesion to both the membrane and cytosol,  
338 or by local binding of adaptor proteins and distinct lipid composition. Simply stated, as the  
339 droplet grows the binding to the cytosol draws it inward and the membrane follows, mediated by  
340 its own binding to the droplet and the requirement that the volume of the droplet be conserved.

341

342 We could now quantify the work performed by the droplet to invaginate the membrane using the  
343 storage and loss moduli obtained from the micro-rheology experiments, geometric data obtained  
344 from super-resolution imaging and other data available from the literature, to solve the explicit  
345 form of the  $\phi$  and  $\psi$  terms (mechanical strain and work, respectively) in Equation (1) as  
346 functions of membrane and cytosol invagination  $\delta$  (Material and Methods; Eq. 4.25-4.26). Using  
347 the Young-Laplace equation, we first estimated an interfacial tension for the droplet-cytosol  
348 interface to be approximately  $\gamma_{dc}$  of  $7 \times 10^{-5} \text{ N}\cdot\text{m}^{-1}$ . This estimate is based on the pressure  
349 difference across the cytosolic interface and the droplet mean curvature (Material and Methods;  
350 Eq. 4.6). Our estimate for the interfacial tension falls within the range of  $10^{-5} \text{ N}\cdot\text{m}^{-1}$  to  $10^{-4} \text{ N}\cdot\text{m}^{-1}$   
351 that has been reported for other protein droplets, including nucleoli and P granules (Material and  
352 Methods; Eq. 4.9) (Brangwynne, Mitchison et al. 2011, Elbaum-Garfinkle, Kim et al. 2015).

353

354 Given our estimates of  $\gamma_{dc}$  we also determined the work of adhesion that is released when the  
355 droplet surfaces are created, as described by the Young-Dupré equation (Fig. 4a, Material and  
356 Methods; Eq. 4.11). We calculated an adhesion energy ( $\psi$ ) of  $4.9 \times 10^{-18} \text{ J}$  from interactions  
357 between the cortical droplet and both the membrane and cytosol (Fig. 4b, Fig. S14, Material and  
358 Methods; Eq. 4.26). Our results suggest that the most significant contribution of the mechanical  
359 energy comes from the droplet-cytosol interface, where the adhesion energy of  $2.9 \times 10^{-18} \text{ J}$  is  
360 enough to overcome an energy penalty of  $2.4 \times 10^{-18} \text{ J}$  to deform the membrane and the cytosol.  
361 This energy cost includes the elastic, viscous, and interfacial stress penalties (Fig. 4b, Fig. S14,  
362 Table S4). We also calculated an average adhesion energy of  $1.3 \text{ kJ}\cdot\text{mol}^{-1}$  at the droplet-cytosol  
363 interface (Material and Methods), which is consistent with the free energies expected of non-  
364 covalent interactions (Mahadevi and Sastry 2016).

365

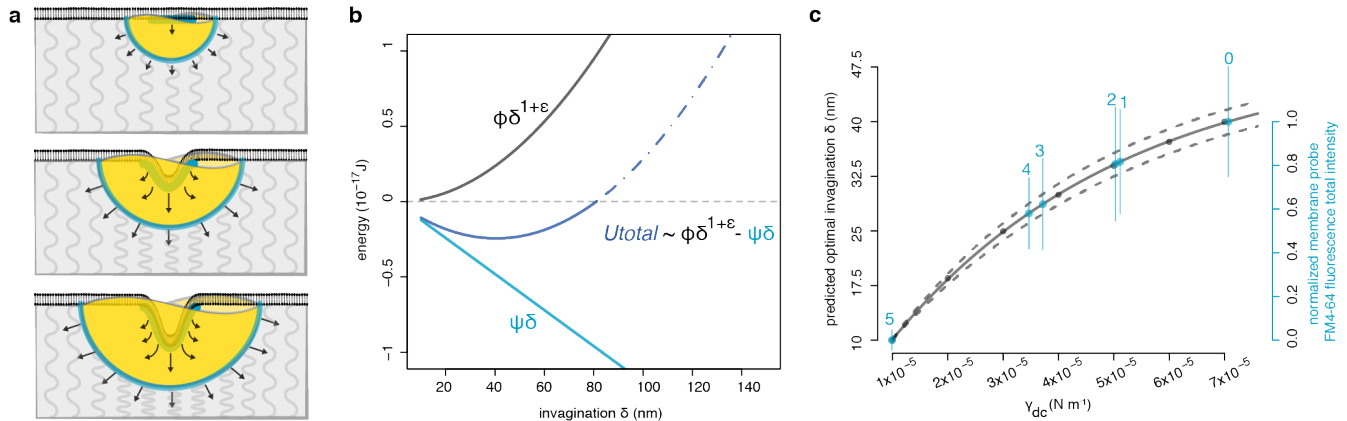

366  
367

368 **Figure 4 | Cortical droplets do mechanical work to deform the membrane and cytosol** (a) Illustration  
369 of a cortical droplet (gold) that binds to (wets) a bilayer membrane (black) and drives membrane  
370 invagination (top to bottom). Resultant membrane deformations reflect how forces balance under a  
371 Young-Dupré adhesion gradient (blue lines and arrows). Resistance to deformation is represented by grey  
372 curved lines. (b) Equation (1) (insert) was used to calculate the energy penalties ( $\phi$ ) and contributions ( $\psi$ )  
373 at the cytosol and membrane interfaces with the cortical droplet. Total energy of the system (dark blue),  
374 energy penalties (black) and energy contributions (light blue) are presented as a function of membrane  
375 invagination ( $\delta$ ). The energy of membrane invagination is favourable for  $\delta$  between about 15-80 nm (solid  
376 blue line) and unfavourable above 80 nm (dashed blue line). Quantities used to calculate energies are  
377 detailed in Figure S14 and Tables S3-4. (c) Our model predicts that vesicle size is proportional to the  
378 strength of droplet intermolecular protein-protein interactions that are proportional to  $\gamma_{dc}$ , the droplet-to-  
379 cytosol interfacial tension. Predicted membrane invagination  $\delta$  as a function of  $\gamma_{dc}$  (left axis and black  
380 points). Data points were fitted to an exponential decay function (full line) with 95% confidence interval  
381 (dashed lines). Titration of 1,6-hexanediol was used to reduce intermolecular cohesion and therefore  $\gamma_{dc}$   
382 resulting in reduced vesicle size as measured by uptake of the lipophilic membrane probe FM4-64 into  
383 *GPD1A* Sla1-YFP cells treated with Lat A (Right axis, red) *versus* % HD (blue numbers,  $n=25$ , mean  $\pm$   
384  $sd$ ) expressed as a function of the droplet-cytosol interfacial tension  $\gamma_{dc}$  (Material and Methods).

385

386 Our model provides a physical framework to explain how cortical droplets do the mechanical  
387 work needed to induce invagination of membranes in actin-independent CME. The interface  
388 between droplets, formed, by phase separation of disordered proteins into cortical bodies, and the  
389 cytosol- membrane interface deforms the surrounding materials through adhesive interactions.  
390 Invagination occurs when  $\psi$  dominates  $\phi$  and this is favored within the observed  $\delta$  interval of 40  
391 nm to 80 nm (Fig. S14). Notably, this predicted  $\delta$  interval is within the range of plasma  
392 membrane invagination of  $\sim 70$  nm at which point a membrane scission mechanism is activated  
393 and vesicle generation is completed (Idrissi, Blasco et al. 2012).

394

395 We propose that cortical droplets store and dissipate mechanical energy in the form of surface  
396 tension, whereby the composition of the droplets determines their interfacial interactions and  
397 provides the energy for adhesion and invagination of membranes. Accordingly, the underlying

398 energy stored within the droplets and the balance of interactions amongst droplet components  
399 and solvent governs the nature of the interface. The effective potential energy  $\psi$  of droplets,  
400 which is equivalent to the total work of adhesion, should be dictated by the density and strengths  
401 of physical interactions amongst proteins within the droplet (the droplet cohesion and interfacial  
402 tensions). We tested this hypothesis by weakening the favorable free energies of the protein-  
403 protein interactions that hold droplet components together using 1,6-hexanediol (HD). These are  
404 the interactions that drive the phase separation of cortical droplets, and so would correspond to a  
405 decrease of the droplet surface tension ( $\gamma_{dc}$  or  $\psi$ ). Our model predicts that invagination depth  
406 should continuously vary with  $\psi$  from Equation (2). We titrated HD below the effective  
407 concentration that prevents protein phase separation and quantified individual membrane  
408 excision events by quantifying uptake of the lipophilic membrane probe FM4-64 into cells by  
409 fluorescence microscopy (Fig. 2a, Material and Methods). In Lat A treated *GPD1* $\Delta$  cells, this  
410 measures the amount of labeled membrane taken up into cells under the action of cortical  
411 droplets alone. By increasing subcritical HD concentration (corresponding to a decrease in  $\psi$ ),  
412 the average fluorescence-labeled membrane per vesicle (a proxy for invagination  $\delta$ ) was  
413 continuously reduced over one order of magnitude in the value of  $\gamma_{dc}$  (Fig. 4c, Material and  
414 Methods; Eq. 2.8). This observation fits with the reduced membrane invagination that we  
415 predicted at the outset (*i.e.*, that  $\delta$  scales with the  $\psi/\phi$  ratio) when the droplet cohesion ( $\gamma_{dc}$  or  $\psi$ )  
416 is also reduced (Fig. 4c, Material and Methods; Eq. 4.2).

417

## 418 Discussion

419

420 Our results provide a framework for answering many questions regarding CME and other  
421 membrane budding processes. Given our observations, how is CME coupled to multiple  
422 signaling pathways that integrate to regulate vesicle formation? For instance, the PLD-containing  
423 CME proteins we investigated are enriched for multiple phosphorylation sites, which undergo  
424 changes in response to activation of a CME-regulating signaling pathway (Kanshin, Bergeron-  
425 Sandoval et al. 2015). Since the amount and distribution of charge in disordered regions of  
426 proteins regulate their interactions and conformations (Das and Pappu 2013), such post-  
427 translational modifications may be important to regulating CME. Our fluorescence microscopy  
428 and electron micrographic evidence from the literature suggests that the cortical droplet remains  
429 associated temporarily with mature vesicles (Kukulski, Schorb et al. 2012). Does the droplet play  
430 any role in trafficking and fusing with, for instance, plasma membrane (protein recycling) or  
431 lysosome (protein degradation)? CME underlies several fundamental mechanisms of vesicle  
432 trafficking and attendant membrane and vesicle protein cargo transport, including late secretory  
433 pathways, endocytosis and neuronal synaptic vesicle recycling. Yeast and human proteins  
434 implicated in clathrin-mediated vesicle trafficking are enriched for long disordered protein  
435 domains (47/23% of proteins with long consecutive disordered regions of 30 residues and more  
436 for humans and yeast, respectively) whereas those involved in two other vesicle trafficking  
437 systems are not (COPI: 8/5%; COPII: 8/5%) (Pietrosemoli, Panca et al. 2013). These



438 observations argue for investigating the generality and conservation of protein droplet adhesion-  
439 driven membrane invagination as the basis of clathrin-mediated vesicle trafficking in the absence  
440 of actin polymerization.

441

442 It is possible that other liquid-liquid phase separated protein and protein nucleic acid droplets  
443 may influence cellular sub-structural dynamics and thus contribute to shaping cell, tissue, and  
444 organism morphology (Bergeron-Sandoval, Safaee et al. 2016, Bauerlein, Saha et al. 2017).  
445 More broadly, interfacial contact potentials between different biological materials could  
446 represent a vastly underestimated source of complex pattern formation in biology, such as has  
447 been observed in embryonic tissue layers (Foty, Pflieger et al. 1996) or recently in a model of  
448 growing brain convolutions (Tallinen, Chung et al. 2016), in protein stabilization (Gupta, Donlan  
449 et al. 2017) and in the ability of clathrin-coated structures to wrap around and pinch collagen  
450 fibers (Elkhatib, Bresteau et al. 2017).

451

## 452 **Acknowledgments**

453

454 The authors acknowledge support from CIHR grants MOP-GMX-152556 (SWM), the US  
455 National Institutes of Health grant R01NS056114 (RVP), the Fonds Québécois de la Recherche  
456 sur la Nature et les Technologies (SWM and PF) and the Human Frontier Science Program  
457 RGP0034/2017 (SWM and RVP). We thank Simon Alberti for insightful discussions and  
458 microNS plasmid, Jackie Vogel for strains, Jacqueline Kowarzyk for technical assistance, Susan  
459 Liebman for the Sup35 plasmids, Daniel Zenklussen and Pascal Raymond for help with FRAP  
460 experiments.

461

## 462 **Author contributions**

463

464 L.P.S.B. and S.W.M. designed all of the research and R.V.P. helped in research designing;  
465 L.P.S.B. performed biological research; L.P.S.B. and H.K.H. performed micro rheology  
466 experiments; L.P.B.S., H.K.H., A.J.E. and A.G.H analyzed micro rheology data; L.P.S.B., A.J.E.  
467 and S.W.M. analyzed biological data; L.P.B.S., H.K.H. and P.F. developed physical droplet  
468 model; L.P.S.B., R.V.P., and S.W.M. combined physical models with data analysis; all authors  
469 wrote the paper.

470

## 471 **Supplementary Materials**

472 Materials and Methods

473 Figures S1-S14

474 Tables S1-S4

475 Movies S1-S2

## 476 References

477

- 478 1. Aghamohammadzadeh, S. and K. R. Ayscough (2009). "Differential requirements for actin  
479 during yeast and mammalian endocytosis." *Nat Cell Biol* **11**(8): 1039-1042.
- 480 2. Alberti, S., R. Halfmann, O. King, A. Kapila and S. Lindquist (2009). "A systematic survey  
481 identifies prions and illuminates sequence features of prionogenic proteins." *Cell* **137**(1): 146-  
482 158.
- 483 3. Anitei, M., C. Stange, C. Czupalla, C. Niehage, K. Schuhmann, P. Sala, A. Czogalla, T. Pursche,  
484 U. Coskun, A. Shevchenko and B. Hoflack (2017). "Spatiotemporal Control of Lipid Conversion,  
485 Actin-Based Mechanical Forces, and Curvature Sensors during Clathrin/AP-1-Coated Vesicle  
486 Biogenesis." *Cell Rep* **20**(9): 2087-2099.
- 487 4. Avinoam, O., M. Schorb, C. J. Beese, J. A. Briggs and M. Kaksonen (2015). "ENDOCYTOSIS.  
488 Endocytic sites mature by continuous bending and remodeling of the clathrin coat." *Science*  
489 **348**(6241): 1369-1372.
- 490 5. Banjade, S., Q. Wu, A. Mittal, W. B. Peeples, R. V. Pappu and M. K. Rosen (2015). "Conserved  
491 interdomain linker promotes phase separation of the multivalent adaptor protein Nck." *Proc Natl*  
492 *Acad Sci U S A* **112**(47): E6426-6435.
- 493 6. Bauerlein, F. J. B., I. Saha, A. Mishra, M. Kalemanov, A. Martinez-Sanchez, R. Klein, I.  
494 Dudanova, M. S. Hipp, F. U. Hartl, W. Baumeister and R. Fernandez-Busnadiego (2017). "In Situ  
495 Architecture and Cellular Interactions of PolyQ Inclusions." *Cell* **171**(1): 179-187 e110.
- 496 7. Bergeron-Sandoval, L. P., N. Safaee and S. W. Michnick (2016). "Mechanisms and  
497 Consequences of Macromolecular Phase Separation." *Cell* **165**(5): 1067-1079.
- 498 8. Boettner, D. R., J. L. D'Agostino, O. T. Torres, K. Daugherty-Clarke, A. Uygur, A. Reider, B.  
499 Wendland, S. K. Lemmon and B. L. Goode (2009). "The F-BAR protein Sypl negatively  
500 regulates WASp-Arp2/3 complex activity during endocytic patch formation." *Curr Biol* **19**(23):  
501 1979-1987.
- 502 9. Brangwynne, C. P., C. R. Eckmann, D. S. Courson, A. Rybarska, C. Hoegge, J. Gharakhani, F.  
503 Julicher and A. A. Hyman (2009). "Germline P granules are liquid droplets that localize by  
504 controlled dissolution/condensation." *Science* **324**(5935): 1729-1732.
- 505 10. Brangwynne, C. P., T. J. Mitchison and A. A. Hyman (2011). "Active liquid-like behavior of  
506 nucleoli determines their size and shape in *Xenopus laevis* oocytes." *Proc Natl Acad Sci U S A*  
507 **108**(11): 4334-4339.
- 508 11. Busch, D. J., J. R. Houser, C. C. Hayden, M. B. Sherman, E. M. Lafer and J. C. Stachowiak  
509 (2015). "Intrinsically disordered proteins drive membrane curvature." *Nat Commun* **6**: 7875.
- 510 12. Carlsson, A. E. and P. V. Bayly (2014). "Force generation by endocytic actin patches in budding  
511 yeast." *Biophys J* **106**(8): 1596-1606.
- 512 13. Conner, S. D. and S. L. Schmid (2003). "Regulated portals of entry into the cell." *Nature*  
513 **422**(6927): 37-44.
- 514 14. Crick, S. L., K. M. Ruff, K. Garai, C. Frieden and R. V. Pappu (2013). "Unmasking the roles of  
515 N- and C-terminal flanking sequences from exon 1 of huntingtin as modulators of polyglutamine  
516 aggregation." *Proceedings of the National Academy of Sciences* **110**(50): 20075-20080.
- 517 15. Cross, R. (2012). "Elastic and viscous properties of Silly Putty." *American Journal of Physics* **80**:  
518 870-875.
- 519 16. da Silva Pedrini, M. R., S. Dupont, A. de Anchieta Camara, Jr., L. Beney and P. Gervais (2014).  
520 "Osmoporation: a simple way to internalize hydrophilic molecules into yeast." *Appl Microbiol*  
521 *Biotechnol* **98**(3): 1271-1280.
- 522 17. Darwin, C. (1859). *On the origin of species by means of natural selection, or, The preservation of*  
523 *favoured races in the struggle for life*. London, J. Murray.
- 524 18. Das, R. K. and R. V. Pappu (2013). "Conformations of intrinsically disordered proteins are  
525 influenced by linear sequence distributions of oppositely charged residues." *Proc Natl Acad Sci U*

- 526            S A **110**(33): 13392-13397.
- 527            19. Derganc, J. and A. Copic (2016). "Membrane bending by protein crowding is affected by protein
- 528            lateral confinement." Biochim Biophys Acta **1858**(6): 1152-1159.
- 529            20. Dill, K. A. and S. Bromberg (2011). Molecular driving forces : statistical thermodynamics in
- 530            biology, chemistry, physics, and nanoscience. London ; New York, Garland Science.
- 531            21. Dmitrieff, S. and F. Nedelec (2015). "Membrane Mechanics of Endocytosis in Cells with
- 532            Turgor." PLoS Comput Biol **11**(10): e1004538.
- 533            22. Elbaum-Garfinkle, S., Y. Kim, K. Szczepaniak, C. C. Chen, C. R. Eckmann, S. Myong and C. P.
- 534            Brangwynne (2015). "The disordered P granule protein LAF-1 drives phase separation into
- 535            droplets with tunable viscosity and dynamics." Proc Natl Acad Sci U S A **112**(23): 7189-7194.
- 536            23. Elkhatib, N., E. Bresteau, F. Baschieri, A. L. Rioja, G. van Niel, S. Vassilopoulos and G.
- 537            Montagnac (2017). "Tubular clathrin/AP-2 lattices pinch collagen fibers to support 3D cell
- 538            migration." Science **356**(6343).
- 539            24. Feric, M., N. Vaidya, T. S. Harmon, D. M. Mitrea, L. Zhu, T. M. Richardson, R. W. Kriwacki, R.
- 540            V. Pappu and C. P. Brangwynne (2016). "Coexisting Liquid Phases Underlie Nucleolar
- 541            Subcompartments." Cell **165**(7): 1686-1697.
- 542            25. Fischer, M., A. C. Richardson, S. N. Reihani, L. B. Oddershede and K. Berg-Sorensen (2010).
- 543            "Active-passive calibration of optical tweezers in viscoelastic media." Rev Sci Instrum **81**(1):
- 544            015103.
- 545            26. Ford, M. G., I. G. Mills, B. J. Peter, Y. Vallis, G. J. Praefcke, P. R. Evans and H. T. McMahon
- 546            (2002). "Curvature of clathrin-coated pits driven by epsin." Nature **419**(6905): 361-366.
- 547            27. Foty, R. A., C. M. Pflieger, G. Forgacs and M. S. Steinberg (1996). "Surface tensions of
- 548            embryonic tissues predict their mutual envelopment behavior." Development **122**(5): 1611-1620.
- 549            28. Gleisner, M., B. Kroppen, C. Fricke, N. Teske, T. T. Kliesch, A. Janshoff, M. Meinecke and C.
- 550            Steinem (2016). "Epsin N-terminal Homology Domain (ENTH) Activity as a Function of
- 551            Membrane Tension." J Biol Chem **291**(38): 19953-19961.
- 552            29. Guilak, F., J. R. Tedrow and R. Burgkart (2000). "Viscoelastic properties of the cell nucleus." Biochem Biophys Res Commun **269**(3): 781-786.
- 553            30. Guo, M., A. J. Ehrlicher, M. H. Jensen, M. Renz, J. R. Moore, R. D. Goldman, J. Lippincott-
- 554            Schwartz, F. C. Mackintosh and D. A. Weitz (2014). "Probing the stochastic, motor-driven
- 555            properties of the cytoplasm using force spectrum microscopy." Cell **158**(4): 822-832.
- 556            31. Guo, M., A. J. Ehrlicher, S. Mahammad, H. Fabich, M. H. Jensen, J. R. Moore, J. J. Fredberg, R.
- 557            D. Goldman and D. A. Weitz (2013). "The role of vimentin intermediate filaments in cortical and
- 558            cytoplasmic mechanics." Biophys J **105**(7): 1562-1568.
- 559            32. Gupta, K., J. A. Donlan, J. T. Hopper, P. Uzdavinys, M. Landreh, W. B. Struwe, D. Drew, A. J.
- 560            Baldwin, P. J. Stansfeld and C. V. Robinson (2017). "The role of interfacial lipids in stabilizing
- 561            membrane protein oligomers." Nature **541**(7637): 421-424.
- 562            33. Harmandaris, V. A. and M. Deserno (2006). "A novel method for measuring the bending rigidity
- 563            of model lipid membranes by simulating tethers." J Chem Phys **125**(20): 204905.
- 564            34. Helfrich, W. (1973). "Elastic properties of lipid bilayers: theory and possible experiments." Z
- 565            Naturforsch C **28**(11): 693-703.
- 566            35. Hendricks, A. G. and Y. E. Goldman (2017). "Measuring Molecular Forces Using Calibrated
- 567            Optical Tweezers in Living Cells." Methods Mol Biol **1486**: 537-552.
- 568            36. Hendricks, A. G., E. L. Holzbaur and Y. E. Goldman (2012). "Force measurements on cargoes in
- 569            living cells reveal collective dynamics of microtubule motors." Proc Natl Acad Sci U S A
- 570            **109**(45): 18447-18452.
- 571            37. Hertz, H. R. (1882). Ueber die Beruehrung elastischer Koerper (On Contact Between Elastic
- 572            Bodies). Leipzig, Germany, 1895.
- 573            38. Hester, J. J. (2008). "The Crab Nebula: An astrophysical chimera." Annual Review of Astronomy
- 574            and Astrophysics **46**: 127-155.
- 575            39. Ho, C. H., L. Magtanong, S. L. Barker, D. Gresham, S. Nishimura, P. Natarajan, J. L. Koh, J.
- 576

- 577 Porter, C. A. Gray, R. J. Andersen, G. Giaever, C. Nislow, B. Andrews, D. Botstein, T. R.  
578 Graham, M. Yoshida and C. Boone (2009). "A molecular barcoded yeast ORF library enables  
579 mode-of-action analysis of bioactive compounds." *Nat Biotechnol* **27**(4): 369-377.
- 580 40. Huh, W. K., J. V. Falvo, L. C. Gerke, A. S. Carroll, R. W. Howson, J. S. Weissman and E. K.  
581 O'Shea (2003). "Global analysis of protein localization in budding yeast." *Nature* **425**(6959): 686-  
582 691.
- 583 41. Hyman, A. A., C. A. Weber and F. Julicher (2014). "Liquid-liquid phase separation in biology."  
584 *Annu Rev Cell Dev Biol* **30**: 39-58.
- 585 42. Idrissi, F. Z., A. Blasco, A. Espinal and M. I. Geli (2012). "Ultrastructural dynamics of proteins  
586 involved in endocytic budding." *Proc Natl Acad Sci U S A* **109**(39): E2587-2594.
- 587 43. Idrissi, F. Z., H. Grotsch, I. M. Fernandez-Golbano, C. Presciatto-Baschong, H. Riezman and M.  
588 I. Geli (2008). "Distinct acto/myosin-I structures associate with endocytic profiles at the plasma  
589 membrane." *J Cell Biol* **180**(6): 1219-1232.
- 590 44. Jiang, H., S. Wang, Y. Huang, X. He, H. Cui, X. Zhu and Y. Zheng (2015). "Phase transition of  
591 spindle-associated protein regulate spindle apparatus assembly." *Cell* **163**(1): 108-122.
- 592 45. Johnson, K. L. K., K.; Roberts, A. D. (1971). "Surface energy and the contact of elastic solid."  
593 *Proc. R. Soc. Lond. A.* **324**: 301-313.
- 594 46. Kanshin, E., L. P. Bergeron-Sandoval, S. S. Isik, P. Thibault and S. W. Michnick (2015). "A cell-  
595 signaling network temporally resolves specific versus promiscuous phosphorylation." *Cell Rep*  
596 **10**(7): 1202-1214.
- 597 47. Khurana, R., C. Coleman, C. Ionescu-Zanetti, S. A. Carter, V. Krishna, R. K. Grover, R. Roy and  
598 S. Singh (2005). "Mechanism of thioflavin T binding to amyloid fibrils." *J Struct Biol* **151**(3):  
599 229-238.
- 600 48. Koenderink, G. H., M. Atakhorrami, F. C. MacKintosh and C. F. Schmidt (2006). "High-  
601 frequency stress relaxation in semiflexible polymer solutions and networks." *Phys Rev Lett*  
602 **96**(13): 138307.
- 603 49. Kroschwald, S., S. Maharana, D. Mateju, L. Malinowska, E. Nuske, I. Poser, D. Richter and S.  
604 Alberti (2015). "Promiscuous interactions and protein disaggregases determine the material state  
605 of stress-inducible RNP granules." *Elife* **4**: e06807.
- 606 50. Kukulski, W., A. Picco, T. Specht, J. A. Briggs and M. Kaksonen (2016). "Clathrin modulates  
607 vesicle scission, but not invagination shape, in yeast endocytosis." *Elife* **5**.
- 608 51. Kukulski, W., M. Schorb, M. Kaksonen and J. A. Briggs (2012). "Plasma membrane reshaping  
609 during endocytosis is revealed by time-resolved electron tomography." *Cell* **150**(3): 508-520.
- 610 52. Kull, H. J. (1991). "Theory of the Rayleigh-Taylor Instability." *Physics Reports-Review Section*  
611 *of Physics Letters* **206**(5): 197-325.
- 612 53. Li, D., L. Shao, B. C. Chen, X. Zhang, M. Zhang and B. Moses (2015). "Extended-resolution  
613 structured illumination imaging of endocytic and cytoskeletal dynamics." *Science (New York,*  
614 *NY)*.
- 615 54. Li, Y., R. Lipowsky and R. Dimova (2011). "Membrane nanotubes induced by aqueous phase  
616 separation and stabilized by spontaneous curvature." *Proc Natl Acad Sci U S A* **108**(12): 4731-  
617 4736.
- 618 55. Lieleg, O., K. M. Schmoller, M. M. Claessens and A. R. Bausch (2009). "Cytoskeletal polymer  
619 networks: viscoelastic properties are determined by the microscopic interaction potential of cross-  
620 links." *Biophys J* **96**(11): 4725-4732.
- 621 56. Lin, Y., D. S. W. Protter, M. K. Rosen and R. Parker (2015). "Formation and Maturation of  
622 Phase-Separated Liquid Droplets by RNA-Binding Proteins." *Molecular Cell* **60**(2): 208-219.
- 623 57. Mahadevi, A. S. and G. N. Sastry (2016). "Cooperativity in Noncovalent Interactions." *Chem Rev*  
624 **116**(5): 2775-2825.
- 625 58. Malinowska, L., S. Kroschwald and S. Alberti (2013). "Protein disorder, prion propensities, and  
626 self-organizing macromolecular collectives." *Biochim Biophys Acta* **1834**(5): 918-931.
- 627 59. Molliex, A., J. Temirov, J. Lee, M. Coughlin, A. P. Kanagaraj, H. J. Kim, T. Mittag and J. P.



- 628 Taylor (2015). "Phase separation by low complexity domains promotes stress granule assembly  
629 and drives pathological fibrillization." *Cell* **163**(1): 123-133.
- 630 60. Munder, M. C., D. Midtvedt, T. Franzmann, E. Nuske, O. Otto, M. Herbig, E. Ulbricht, P.  
631 Muller, A. Taubenberger, S. Maharana, L. Malinowska, D. Richter, J. Guck, V. Zaburdaev and S.  
632 Alberti (2016). "A pH-driven transition of the cytoplasm from a fluid- to a solid-like state  
633 promotes entry into dormancy." *Elife* **5**.
- 634 61. Nott, T. J., E. Petsalaki, P. Farber, D. Jarvis, E. Fussner, A. Plochowietz, T. D. Craggs, D. P.  
635 Bazett-Jones, T. Pawson, J. D. Forman-Kay and A. J. Baldwin (2015). "Phase transition of a  
636 disordered nuage protein generates environmentally responsive membraneless organelles." *Mol*  
637 *Cell* **57**(5): 936-947.
- 638 62. Pappu, R. V., X. Wang, A. Vitalis and S. L. Crick (2008). "A polymer physics perspective on  
639 driving forces and mechanisms for protein aggregation." *Arch Biochem Biophys* **469**(1): 132-  
640 141.
- 641 63. Picco, A., M. Mund, J. Ries, F. Nedelec and M. Kaksonen (2015). "Visualizing the functional  
642 architecture of the endocytic machinery." *Elife* **4**.
- 643 64. Pietrosemoli, N., R. Pancsa and P. Tompa (2013). "Structural disorder provides increased  
644 adaptability for vesicle trafficking pathways." *PLoS Comput Biol* **9**(7): e1003144.
- 645 65. Reichheld, S. E., L. D. Muiznieks, F. W. Keeley and S. Sharpe (2017). "Direct observation of  
646 structure and dynamics during phase separation of an elastomeric protein." *Proc Natl Acad Sci U*  
647 *S A* **114**(22): E4408-E4415.
- 648 66. Ries, J., C. Kaplan, E. Platonova, H. Eghlidi and H. Ewers (2012). "A simple, versatile method  
649 for GFP-based super-resolution microscopy via nanobodies." *Nat Methods* **9**(6): 582-584.
- 650 67. Roman, B. and J. Bico (2010). "Elasto-capillarity: deforming an elastic structure with a liquid  
651 droplet." *J Phys Condens Matter* **22**(49): 493101.
- 652 68. Scher-Zagier, J. K. and A. E. Carlsson (2016). "Local Turgor Pressure Reduction via Channel  
653 Clustering." *Biophys J* **111**(12): 2747-2756.
- 654 69. Sheff, M. A. and K. S. Thorn (2004). "Optimized cassettes for fluorescent protein tagging in  
655 *Saccharomyces cerevisiae*." *Yeast* **21**(8): 661-670.
- 656 70. Skruzny, M., A. Desfosses, S. Prinz, S. O. Dodonova, A. Gieras, C. Uetrecht, A. J. Jakobi, M.  
657 Abella, W. J. H. Hagen, J. Schulz, R. Meijers, V. Rybin, J. A. G. Briggs, C. Sachse and M.  
658 Kaksonen (2015). "An Organized Co-assembly of Clathrin Adaptors Is Essential for  
659 Endocytosis." *Developmental Cell* **33**(2): 150-162.
- 660 71. Style, R. W., C. Hyland, R. Boltyanskiy, J. S. Wettlaufer and E. R. Dufresne (2013). "Surface  
661 tension and contact with soft elastic solids." *Nat Commun* **4**: 2728.
- 662 72. Tallinen, T., J. Chung, F. Rousseau, N. Girard, J. Lefèvre and L. Mahadevan (2016). "On the  
663 growth and form of cortical convolutions." *Nature Physics* **12**: 588–593.
- 664 73. Tarassov, K., V. Messier, C. R. Landry, S. Radinovic, M. M. Serna Molina, I. Shames, Y.  
665 Malitskaya, J. Vogel, H. Bussey and S. W. Michnick (2008). "An in vivo map of the yeast protein  
666 interactome." *Science* **320**(5882): 1465-1470.
- 667 74. Thompson, D. A. W. (1917). *On growth and form*. Cambridge Eng., University press.
- 668 75. Toombs, J. A., B. R. McCarty and E. D. Ross (2009). "Compositional Determinants of Prion  
669 Formation in Yeast." *Molecular and Cellular Biology* **30**(1): 319-332.
- 670 76. Updike, D. L., S. J. Hachey, J. Kreher and S. Strome (2011). "P granules extend the nuclear pore  
671 complex environment in the *C. elegans* germ line." *J Cell Biol* **192**(6): 939-948.
- 672 77. Watson, H. A., M. J. Cope, A. C. Groen, D. G. Drubin and B. Wendland (2001). "In vivo role for  
673 actin-regulating kinases in endocytosis and yeast epsin phosphorylation." *Mol Biol Cell* **12**(11):  
674 3668-3679.
- 675 78. Wei, M.-T., S. Elbaum-Garfinkle, A. S. Holehouse, C. C.-H. Chen, M. Feric, C. B. Arnold, R. D.  
676 Priestley, R. V. Pappu and C. P. Brangwynne (2017). "Phase behaviour of disordered proteins  
677 underlying low density and high permeability of liquid organelles." *NATURE CHEMISTRY*.
- 678 79. Wheeler, J. R., T. Matheny, S. Jain, R. Abrisch and R. Parker (2016). "Distinct stages in stress

- 679 granule assembly and disassembly." *Elife* **5**.  
680 **80.** Xi, K., T. Byrnes and H. Saito (2017). "Fingering instabilities and pattern formation in a two-  
681 component dipolar Bose-Einstein condensate." *arXiv* **1704.04949v1**  
682 81. Youn, J. Y., H. Friesen, T. Kishimoto, W. M. Henne, C. F. Kurat, W. Ye, D. F. Ceccarelli, F.  
683 Sicheri, S. D. Kohlwein, H. T. McMahon and B. J. Andrews (2010). "Dissecting BAR domain  
684 function in the yeast Amphiphysins Rvs161 and Rvs167 during endocytosis." *Mol Biol Cell*  
685 **21**(17): 3054-3069.  
686 82. Yu, H. and K. Schulten (2013). "Membrane sculpting by F-BAR domains studied by molecular  
687 dynamics simulations." *PLoS Comput Biol* **9**(1): e1002892.  
688 83. Zhang, H., S. Elbaum-Garfinkle, E. M. Langdon, N. Taylor, P. Occhipinti, A. A. Bridges, C. P.  
689 Brangwynne and A. S. Gladfelter (2015). "RNA Controls PolyQ Protein Phase Transitions."  
690 *Molecular Cell* **60**(2): 220-230.  
691 84. Zhang, W., P. Soman, K. Meggs, X. Qu and S. Chen (2013). "Tuning the Poisson's Ratio of  
692 Biomaterials for Investigating Cellular Response." *Adv Funct Mater* **23**(25): 3226-3232.  
693 85. Zhao, H., A. Michelot, E. V. Koskela, V. Tkach, D. Stamou, D. G. Drubin and P. Lappalainen  
694 (2013). "Membrane-sculpting BAR domains generate stable lipid microdomains." *Cell Rep* **4**(6):  
695 1213-1223.  
696
