1

2

### 3 Endocytosis caused by liquid-liquid phase separation of proteins

4

5 Louis-Philippe Bergeron-Sandoval<sup>1</sup>, Hossein Khadivi Heris<sup>2</sup>, Catherine Chang<sup>3</sup>, Caitlin E.  
6 Cornell<sup>3</sup>, Sarah L. Keller<sup>3</sup>, Paul François<sup>4</sup>, Adam G. Hendricks<sup>2</sup>, Allen J. Ehrlicher<sup>2</sup>, Rohit V.  
7 Pappu<sup>5</sup> and Stephen W. Michnick<sup>1,6\*</sup>

### 8 Affiliations

9 †Département de Biochimie, Université de Montréal, C.P. 6128, Succursale centre-ville, Montréal, Québec,  
10 H3C 3J7, Canada.

11 ‡Department of Bioengineering, McGill University, 817 Sherbrooke St West, Room 270, Montreal, Quebec,  
12 H3A 0C3, Canada.

13 †Department of Chemistry, University of Washington, Seattle, Seattle WA 98195-1700 USA

14 †Ernest Rutherford Physics Building, McGill University, 3600 University St, Montreal, Québec, H3A 2T8

15 †Department of Biomedical Engineering and Center for Biological Systems Engineering, Washington  
16 University in St. Louis, One Brookings Drive, Campus Box 1097, St. Louis, Missouri 63130, USA.

17 †Centre Robert-Cedergren, Bio-Informatique et Génomique, Université de Montréal, C.P. 6128, Succursale  
18 centre-ville, Montréal, Québec, H3C 3J7, Canada.

19

20 \*Correspondence to: S.W.M. ([stephen.michnick@umontreal.ca](mailto:stephen.michnick@umontreal.ca)).

21

### 22 Summary

23

24 Endocytosis underlies intra- and extracellular material trafficking in eukaryotes, and is essential to  
25 protein metabolism, intercellular signaling, membrane remodeling and other cell regulatory  
26 processes. Although endocytosis is usually driven by F-actin polymerization in yeast cells,  
27 membrane invagination can also occur through a yet unknown actin-independent mechanism when  
28 turgor pressure is relieved. Here, we demonstrate that membrane invagination can arise from  
29 liquid-liquid phase separation (demixing) of proteins with prion-like domains (PLD) from the  
30 cytosol. Demixing of these proteins results in the formation of a protein condensate, which, by  
31 virtue of its composition and viscoelastic properties, binds to and deforms plasma membrane and  
32 cytosol. Demonstration that phase separated condensates can perform mechanical work expands  
33 the repertoire of known functions of protein condensates to include the ability to do work at soft  
34 interfaces such as between the condensate and the membrane. Similar mechanisms may govern or  
35 contribute to other membrane shaping, invagination and budding processes that are involved in  
36 cellular material uptake, secretion, and cell shape remodeling.

## 37 Introduction

38 Evolution has resulted in numerous innovations by which morphogenesis of organisms  
39 occurs within limits imposed by physical and chemical constraints (Darwin 1859, Thompson  
40 1917). One such process is clathrin-mediated endocytosis (CME) a fundamental mechanism of  
41 cell surface membrane receptor turnover and recycling, nutrient uptake and synaptic vesicle  
42 regeneration, among others (Conner and Schmid 2003). The mechanism of membrane invagination  
43 through endocytosis in budding yeast cells has most convincingly been demonstrated to be growth  
44 of membrane-bound branched actin (Skruzny, Brach et al. 2012), although the term “CME” has  
45 historically been retained. When actin is polymerized, it bundles into an active gel with mechanical  
46 properties that facilitate endocytosis at localized sites (Carlsson and Bayly 2014, Weirich,  
47 Banerjee et al. 2017). However, CME has also been shown to occur under conditions where actin  
48 polymerization is absent in both yeast and mammalian cells (Aghamohammadzadeh and Ayscough  
49 2009, Basu, Munteanu et al. 2014, Li, Shao et al. 2015).

50  
51 The contribution of actin polymerization to CME in mammalian cells is ambiguous, since equal  
52 population of clathrin-coated pits mature into vesicles either with or without the need for cortical  
53 filamentous actin at endocytic sites (Li, Shao et al. 2015). In the budding yeast *S. cerevisiae*, the  
54 dominant mechanism for vesicle generation in CME is branched actin assembly, which is required  
55 to compete against intracellular turgor pressure and membrane tension to drive the invagination of  
56 the plasma membrane (Carlsson and Bayly 2014). If, however, turgor pressure is eliminated in  
57 yeast cells, CME can also occur, independent of actin polymerization (Aghamohammadzadeh and  
58 Ayscough 2009). A similar phenomenon has been observed in fission yeast (Basu, Munteanu et  
59 al. 2014). Several mechanisms that could explain actin-independent membrane invagination in  
60 CME have been proposed (see Discussion) but individual or combined contributions of these  
61 mechanisms to CME *in vivo* remain unclear.

62  
63 Here, we present evidence for a novel mechanism of actin-independent CME in a yeast cell mutant  
64 model in which turgor pressure is relieved and actin polymerization is specifically inhibited  
65 (Figure 1A and S1). This mechanism was suggested to us by the observation that there is a common  
66 intrinsically disordered amino acid sequence pattern called prion-like domains (PLD) found among  
67 coat and adapter proteins Sla1/2, Ent1/2 and Yap1801/2 (Figure 1A) (Alberti, Halfmann et al.  
68 2009, Malinowska, Kroschwald et al. 2013). PLD-containing proteins are known to phase separate  
69 *in vitro* and in cells and interact through amino acid sequence motifs found within the PLDs  
70 (Alberti, Saha et al. 2018, Wang, Choi et al. 2018). Phase separation leads to spherical condensates  
71 that are hundreds of nanometers to micrometers in size with a range of viscoelastic properties  
72 (Pappu, Wang et al. 2008, Brangwynne, Eckmann et al. 2009, Kroschwald, Maharana et al. 2015,  
73 Molliex, Temirov et al. 2015, Wang, Choi et al. 2018). Nucleation and growth of such condensates  
74 within cells has the potential to deform the cytosol and other elastic structures found inside these  
75 cells (Style, Sai et al. 2018). It has also been demonstrated that membranes can be deformed *in*  
76 *vitro* by liquid-liquid phase separation of polymer condensates (Li, Lipowsky et al. 2011).

77  
78  
79  
80  
81  
82  
83  
84  
85

We postulate that such condensates exist at CME initiation sites and that, owing to their viscoelastic properties and interfacial tension, bind to the plasma membrane adaptors and generate force to drive invagination of the membrane (Figure 1A). This model can implicitly include and integrate the contributions of the previously proposed mechanisms for membrane invagination in actin-independent CME (detailed in the Discussion). Notably, our model explains how proteins are concentrated at endocytic sites to bind to and alter the properties or composition of the membrane, such that elastic resistance of the membrane to deformation is reduced.

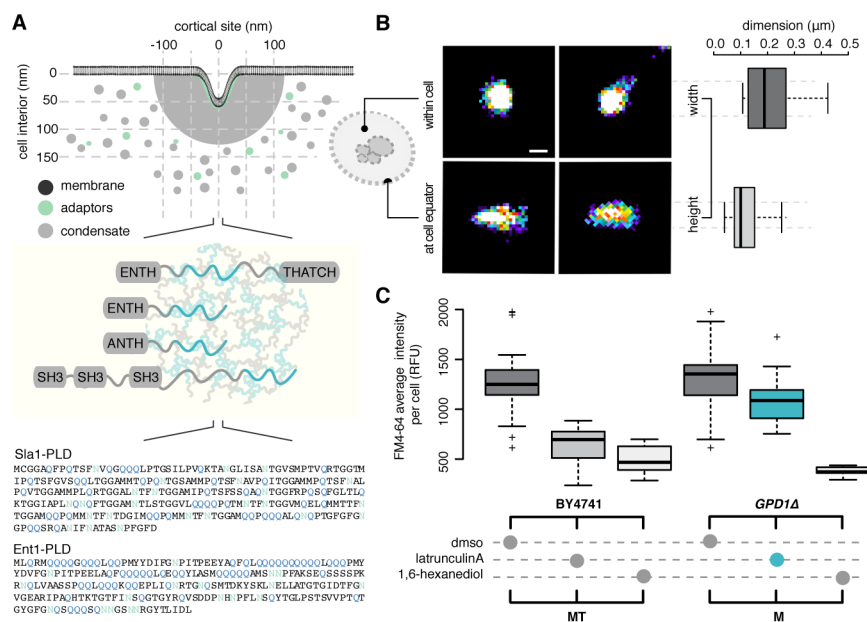

86  
87  
88  
89  
90  
91  
92  
93  
94  
95  
96  
97  
98  
99  
100  
101  
102  
103  
104  
105  
106  
107

**Figure 1 | Phase-separation of proteins into an endocytic condensate can drive clathrin-mediated endocytosis** (A) (Upper panel) Illustration of the geometry of a plasma membrane (dark grey) invagination into the cell during clathrin-mediated endocytosis (CME). Electron microscopic data suggest that clathrin-coated plasma membrane patches are surrounded by a cortical body of  $\sim 200$  nm diameter (light grey) before appearance of actin structures. Clathrin heavy and light chains (Chc1 and Clc1) interact with adaptor proteins (Ede1 and Syp1) to form a lattice on the membrane (in green). Subsequently, early coat proteins (light grey), such as Sla1/2, Ent1/2, and Yap1801/2, directly bind to the adaptor-clathrin lattice and form the endocytic condensate (in grey). (middle panel) Coat proteins Sla1/2, Ent1/2 and Yap1801/2 contain “Prion-like domains” (PLD, in blue) that include tandem repeats of asparagine and glutamine. (lower panel) Examples of PLD sequences from Sla1 and Ent1 (B) Geometry and size distribution of coat protein Sla1-GFP at cortical sites measured using super-resolution microscopy (dSTORM). Lateral x, y resolution was  $\sim 10$  nm. Pseudo-color reconstructed images show circular structures (left panels) when viewed from the top, or within cells (left, upper), but form narrow ellipses when imaged at the equator of cells (left, lower). Automatic segmentation and morphological analysis (right panels) were performed on these reconstructed images to determine the width ( $209 \pm 10$  nm) and height ( $118 \pm 6$  nm) of cortical bodies (mean  $\pm$  sd;  $n = 250$ ), consistent with other electron and light micrographic evidence. (C) Lipophilic cargo membrane-labelling dye FM4-64 is taken up into vesicles by CME in wild type BY4741 (left) and *GPD1* $\Delta$  cells (eliminates turgor pressure; right) treated with either DMSO, latrunculin A (prevents F-actin polymerization) or 1,6-hexanediol (disrupts liquid-liquid phase separated protein condensates). Each boxplot (center line, median; box, upper and lower quartiles; whiskers, 1.5x IQR; crosses, outliers) shows

108 the relative fluorescence units of  $n = 50$  cells. Note that *GPD1* $\Delta$  cells can undergo CME in the absence of  
109 F-actin polymerization (blue) because there is no turgor pressure in these cells. See also Figure S1.

110

### 111 **PLD-containing CME proteins phase-separate into protein condensates**

112

113 We first observed protein puncta that form at cortical sites of  $209 \pm 10$  nm diameter and  $118 \pm 6$   
114 nm height by super-resolution fluorescence imaging of the PLD-containing endocytic coat protein  
115 Sla1 in *GPD1* $\Delta$  cells treated with Latrunculin A (Lat A), an inhibitor of actin polymerization  
116 (Figure 1B and S1). Our data, which are similar to reported measures of Sla1 high resolution  
117 structures (Mund, van der Beek et al. 2017), indicate that Sla1 assembles into a dome-shaped  
118 structure under the conditions that we performed these experiments, consistent with a protein  
119 condensate (henceforth called the endocytic condensate) that associates with the membrane on  
120 cortical sites. Other existing evidence that a protein condensate could exist at CME sites include  
121 electron and light microscopic studies that reveal a region surrounding CME membrane  
122 invaginations of  $\sim 200$  nm diameter that are devoid of ribosomes. Furthermore, before actin  
123 polymerization is initiated (as visualized by fluorescent protein-tagged Apb1) these “ribosome-  
124 free zones” are also observed on most sites (75%) suggesting that these zones can be composed of  
125 coat proteins (as visualized by fluorescent protein-tagged Sla1) and do not contain polymerized  
126 actin (Kukulski, Schorb et al. 2012). Sla1-labelled condensates thus appear to present a physical  
127 barrier to large molecular complexes, at least as large as ribosomes ( $> 25$  nm). We next performed  
128 a series of experiments to establish that endocytic puncta are phase-separated protein condensates  
129 and we probed their properties and permeability.

130

131 The simple alcohol 1,6-hexanediol (HD) has been demonstrated to prevent liquid-liquid phase  
132 separation of proteins *in vivo* and *in vitro* (Updike, Hachey et al. 2011, Kroschwald, Maharana et  
133 al. 2015, Molliex, Temirov et al. 2015). CME, as measured by cell uptake of a lipophilic  
134 membrane-bound fluorescent dye (FM4-64), was inhibited by HD, whether or not turgor pressure  
135 and actin polymerization were present (Figure 1C, left *versus* right panels, respectively).  
136 Furthermore, HD prevented uptake of the fluorescent dye Lucifer Yellow (LY) into vacuoles and  
137 formation of puncta monitored as Sla1-GFP fluorescence at cortical sites in a dose-dependent  
138 manner. No effect was observed in cells treated with the related alcohol 1,2,3-hexanetriol that does  
139 not disrupt condensates (Figure 2A and S2A). The other PLD-containing proteins, including Sla2,  
140 Ent1, Ent2, Yap1801 and Yap1802, all failed to form puncta in cells treated with HD (Figure S2A).  
141 Pulse-chase experiments showed that HD-dependent dissolution of Sla1 puncta was reversible  
142 (Figure S2B and Movie S1). In controls, we found 5% HD has no major effect on the integrity of  
143 lipid vesicles containing carboxyfluorescein as an indicator of leakage (Figure S2C-E).

144

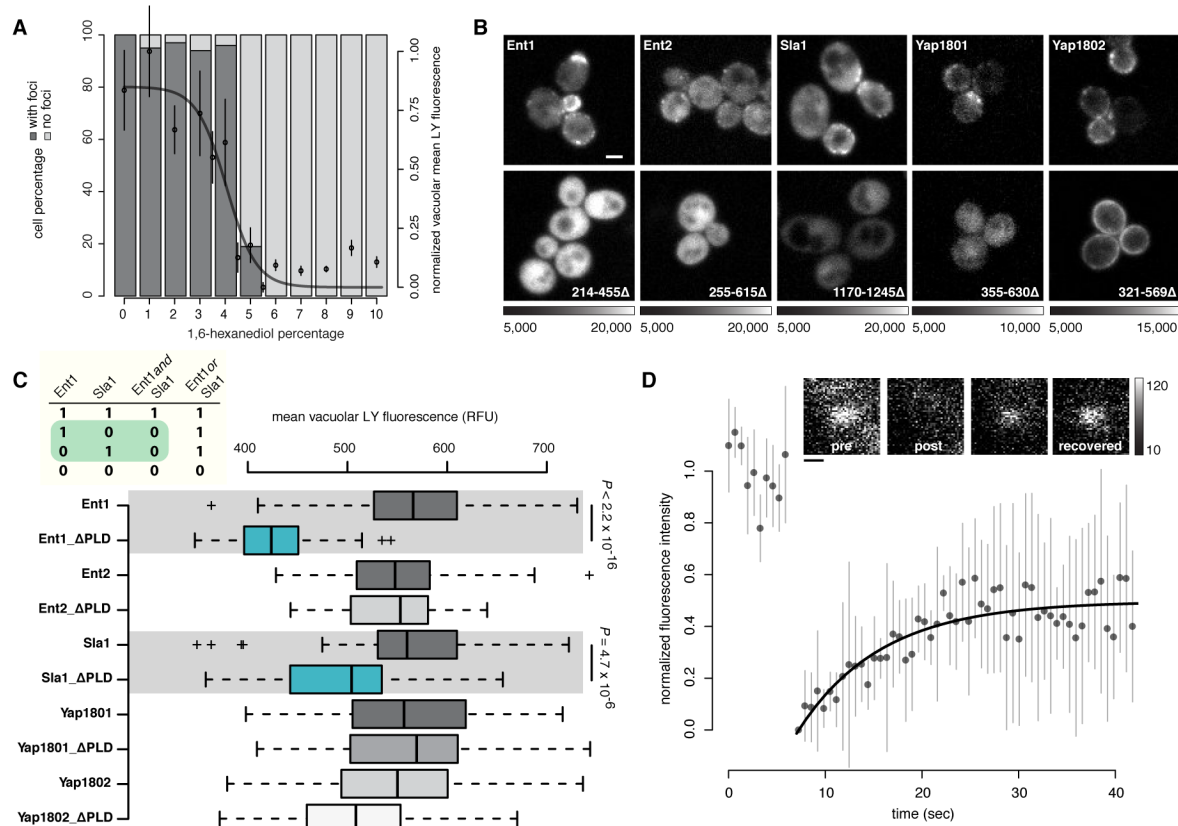

145  
146  
147  
148  
149  
150  
151  
152  
153  
154  
155  
156  
157  
158  
159  
160  
161  
162  
163  
164  
165  
166  
167  
168  
169  
170

**Figure 2 | CME adaptor and coat proteins phase separate to form condensates** (A) 1,6-hexanediol (HD), disrupts endocytic condensates in an all-or-none manner. Barplot shows percentage of cells that contain Sla1-GFP foci (dark grey), or not (light grey), as a function of HD concentration monitored by counting fluorescent puncta containing Sla1-GFP at cortical sites 5 minutes after HD treatment ( $n = 150$  cells). Plot overlay (in black) shows quantification of lucifer yellow fluorescent dye uptake in CME vesicles (mean  $\pm$  sd;  $n = 25$  foci; logistic fit) (B) Prion-like domains (PLDs) are essential for localization of proteins to the cortical sites. Fluorescence images of cortical localization of Ent1, Ent2, Sla1, Yap1801 and Yap1802 fused to Venus YFP. Localization of full-length (upper panels) *versus* C-terminal PLD truncation mutants of the proteins (lower panels). Amino acid positions of the deleted PLDs are indicated for respective images. Grayscale dynamic range for image pairs are indicated below. Scale bar, 2  $\mu$ m. (C) Quantification (box center line, median; box limits, upper and lower quartiles; whiskers, 1.5x IQR; crosses, outliers) by fluorescence microscopy of lucifer yellow dye uptake for strains that express either full-length or PLD-truncated Ent1, Ent2, Yap1801, Yap1802 and Sla1 (as detailed in panel b). We observed a significant decrease in CME for PLD truncation mutants of Sla1 and Ent1 ( $n = 100$  cells; two-sided t-test; see Methods). Presence (1) or absence (0) of the PLDs of either Ent1 or Sla1 are the input variables in the truth table (top insert; values that we determined in green). (D) Coat proteins exchange with endocytic condensates at rates typical of those observed for proteins that compose other protein condensates. Fluorescence recovery after photo bleaching (FRAP) of Sla1-GFP, GFP signal recovery was measured within a segmented Sla1-mCherry region of interest to ensure that FRAP was acquired within the endocytic condensate (mean  $\pm$  sd;  $n = 10$  cells. Data was fitted to a single term recovery equation) (Methods). Incomplete fluorescence recovery suggests that endocytic condensates are viscoelastic. Representative foci images before bleaching, upon bleaching, and after recovery are shown in inserts. 8-bit grayscale values, 10 to 120. Scale bar, 250 nm. See also Figure S2.

171 Alberti *et al.* reported that PLDs of Sla1/2, Ent1/2 and Yap1801/2 all form puncta individually,  
172 without amyloid fibril structures, as probed by binding to Thioflavin T (ThT) (Khurana, Coleman  
173 *et al.* 2005, Alberti, Halfmann *et al.* 2009). Consistent with the behavior of these PLD fragments  
174 and formation of non-amyloid condensates, we observed no colocalization of ThT with Sla1-  
175 mCherry-labelled puncta (Figure S2F-G).

176  
177 We observed that the PLDs of CME coat proteins were essential to their localization to cortical  
178 sites (Figure 2B). Furthermore, CME was significantly reduced in cells where the PLDs of Sla1  
179 and Ent1 were deleted and with substitutions of proline for other residues in the Sla1 PLD, which  
180 weakens the driving force for phase separation (Figure 2C and S2H) (Toombs, McCarty *et al.*  
181 2009, Peskett, Rau *et al.* 2018). Our results are consistent with previous reports of the mis-  
182 localization of the N-terminal SH3 domains of Sla1 (Warren, Andrews *et al.* 2002) and of the Ent2  
183 ENTH2 domain (Mukherjee, Coon *et al.* 2009). They are also consistent with disruption of CME  
184 resulting from deletion of the Sla1 C-terminal region (Warren, Andrews *et al.* 2002). While some  
185 functional redundancy is possible among the PLD-containing coat proteins, the two that are most  
186 essential, Sla1 and Ent1, are both required for specific protein-protein interactions and/or functions  
187 mediated by other domains within their sequences.

188  
189 The interactions among proteins in liquid-liquid phase separated condensates are expected to be  
190 weak (Li, Chavali *et al.* 2018), explaining their rapid exchange within and between condensates  
191 and their surroundings (Brangwynne, Eickmann *et al.* 2009, Lin, Protter *et al.* 2015, Feric, Vaidya  
192 *et al.* 2016). In fluorescence recovery after photobleaching (FRAP) experiments we measured  
193 equivalent mobile and immobile fractions ( $0.50 \pm 0.02$ ; mean  $\pm$  sem) for the protein Sla2 (Figure  
194 2E), similar to other protein and nucleic acid condensates including the dense internal fibrillar  
195 component of *X. laevis* nucleoli (Feric, Vaidya *et al.* 2016). We acquired recovery traces when the  
196 apparent number of Sla2 molecules in the fluorescent foci remains relatively constant (pre-bleach  
197 intensities do not increase in Figure 2E).

198

### 199 **Condensation is required for CME protein-protein interactions and endocytosis**

200

201 The regulation of CME involves the dynamic assembly of a protein-protein interaction network  
202 through mostly transient and weak protein-protein interactions (Boeke, Trautmann *et al.* 2014).  
203 This observation begs a subtle and important question: Is the formation of the protein-protein  
204 interaction network the result of phase separation into condensates or do endocytic condensates  
205 reflect the formation of an obligate and fixed protein-protein interaction network? One could  
206 argue, for instance, that deletion of the PLDs of Sla1 and Ent1 prevents membrane invagination  
207 and therefore endocytosis by virtue of removal of binding motifs in the PLDs required for  
208 interactions of both of these proteins (Figure 2B-C). It could even be argued that the subtle proline  
209 substitution mutations in the Sla1 PLD inhibit CME because they prevent protein-protein

210 interactions by disrupting alpha-helical structural motifs essential for the protein-protein  
211 interactions of Sla1 (Figure S2H).

212

213 We distinguish these two possibilities based on simple logic as formally introduced in a truth table  
214 (Figure 3A, D): If the PLDs of Ent1 and Sla1 are *both* required for forming protein-protein  
215 interactions essential for CME then we *cannot* substitute the PLD of one for the other. If, however,  
216 we can substitute one PLD for the other and recover both phase separation and CME function, then  
217 the properties of the PLDs that allow them to phase-separate and allow for endocytosis is important  
218 rather than the fixed protein interaction network. A caveat would arise if Sla1 and Ent1 PLDs  
219 shared common binding motifs that govern essential protein-protein interactions. We found,  
220 however, that Sla1 PLD and Ent1 PLD share low sequence identity (23.6 percent) and the single  
221 motif TG(F/Y)GFGN (Figure S3A). More importantly, they share only two protein-protein  
222 interactions that are not essential to endocytosis (Chc1 and Ubi4; physical interactions detected by  
223 at least two experiments from the BioGRID database).

224

225 Since both Sla1 *and* Ent1 PLD domains are essential for endocytic condensate localization and  
226 endocytosis (Figure 2C), we needed to test the essentiality of the PLD of only one of these proteins  
227 and therefore chose that of Sla1. We first compared the protein-protein interactions between  
228 *wildtype* and the PLD deletion mutant of Sla1 *in vivo* using a Protein-fragment Complementation  
229 Assay with the reporter protein DiHydroFolate Reductase (DHFR PCA) (Figure S3B-C). We  
230 confirmed 13 potential Sla1 protein-protein interactions selected from *BioGRID* ([thebiogrid.org](http://thebiogrid.org))  
231 found amongst membrane adaptors (Chc1, Ede1, End3), PLD-containing coat proteins (Sla1, Sla2,  
232 Yap1802), actin polymerization machinery (Arc40, Las17, Lsb3, Ysc84, Abp1) and chaperones  
233 (Hsp104, Ssa2). Selection for DHFR reconstitution with Sla1, in which the PLD was deleted (*Sla1*  
234  $\Delta$ PLD), revealed that all interactions are lost with the exception of 2, Sla2 and Apb1 (Figure S3B-  
235 C). The loss of interactions is consistent with yeast two-hybrid studies of Sla1 in which the C-  
236 terminal repeats, within our PLD, are deleted resulting in loss of Sla1 protein-protein interactions  
237 (Tang, Xu et al. 2000). We observed that phase separation of Sla1 *in vitro* is equivalent after  
238 deletion of the PLD while phase separation of Ent1 in which the PLD was deleted (Ent1- $\Delta$ PLD)  
239 is completely prevented under the same conditions (Figure S3D). We thus conclude that *in vivo*,  
240 the PLD of Sla1 is essential for normal CME function and Sla1 protein-protein interactions (Figure  
241 2 and S3B-C).

242

243 We next distinguished between the two opposing PLD-driven phase-separation *versus* obligate  
244 protein-protein interaction network hypotheses (Figure 3A). We did this by comparing results of  
245 phase separation and endocytosis for the substitution of PLD domains in either Ent1 or Sla1.

246

247 We thus engineered two types of chimeric proteins that contain either Sla1 PLD or sequence  
248 variants of Sup35 NM fused to N-terminal ENTH region (ENTH1) of yeast Epsin protein Ent1.  
249 We included sequence variants of Sup35 NM – a PLD of the classic prion protein Sup35 in which

250 either all asparagine (N) residues are substituted with glutamine (Q) or *vice versa* in the NM  
 251 domain, yielding mutants Sup35 NM(Q) and Sup35 NM(N). We chose these sequences for two  
 252 reasons. First, Sup35 is the archetypal prion protein used to determine sequence compositions of  
 253 all PLDs in the yeast genome. Second, because the mutant Sup35 NM(Q) shares amino acid  
 254 composition with Sla1 PLD and both undergo non-nucleation-limited self-assembly (Alberti,  
 255 Halfmann et al. 2009, Khan, Kandola et al. 2018). We also engineered chimeric Epsin proteins  
 256 from the yeast paralog Ent2 (for which the PLD is essential for phase separation but not for CME  
 257 function) and human homologs EPN1/3 as controls (Figure 3C).  
 258

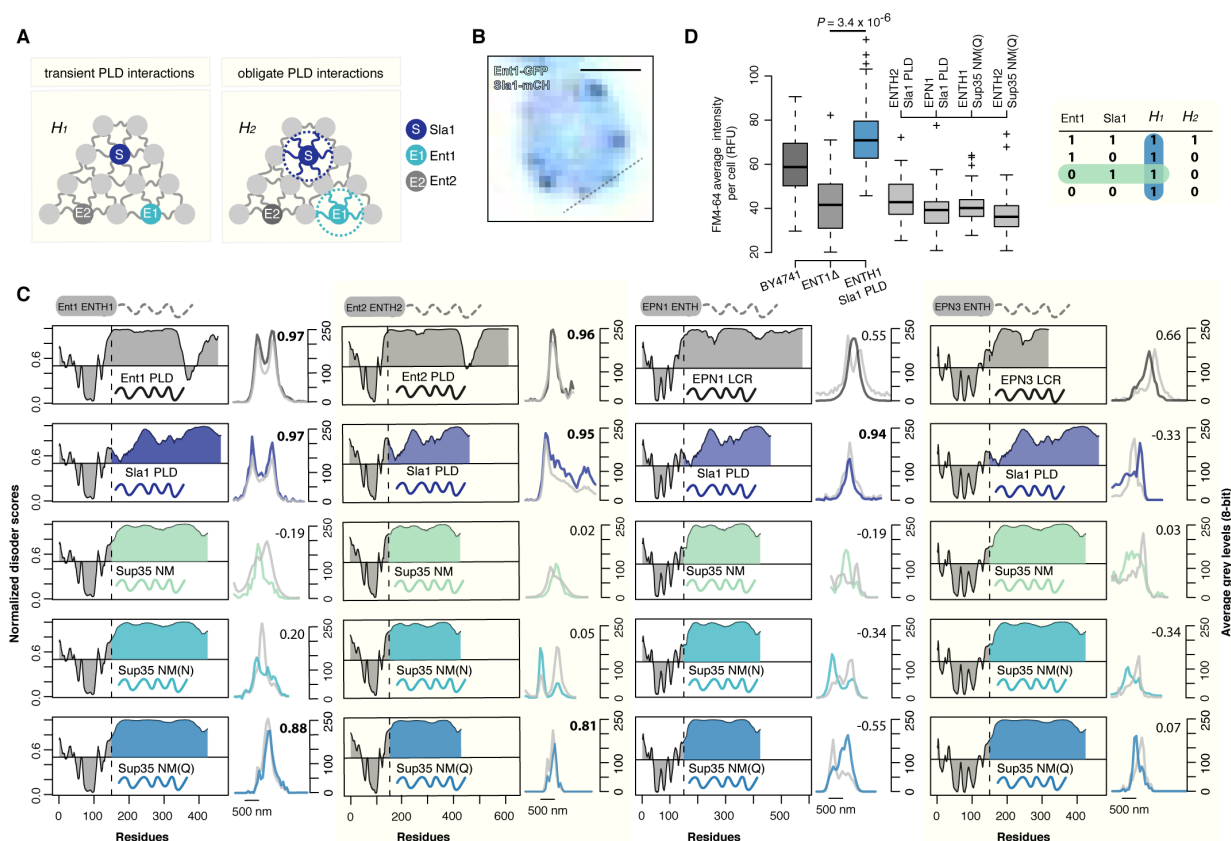

259  
 260  
 261 **Figure 3 | PLDs are interchangeable and modulate assembly of chimeric proteins into phase-**  
 262 **separated bodies** (A) Illustration of the hypothesis (H<sub>1</sub>) that coat proteins condense together through  
 263 transient PLD interactions, and the alternate hypothesis (H<sub>2</sub>) that coat proteins assemble into a complex  
 264 through obligate protein-protein interactions. (B) Colocalization of Ent1-GFP signal within a Sla1-mCherry  
 265 foci in yeast cells, line scan was performed as indicated. Scale bar 1 μM. (C) In the first column, the left  
 266 panels show the PDR-fit score (VLS2) for *wildtype* (grey) and chimeric proteins; chimeras include  
 267 ENTH1 fused to either Sla1 PLD or Sup35 NM or Sup35 NM(N) or Sup35 NM(Q). Scores above 0.5  
 268 indicate the protein region is predicted to be disordered. Right panels show line scans to assess if *wildtype*  
 269 or chimeric proteins colocalize with Sla1 foci (grey) in yeast cells. Example of a line scan is given in B.  
 270 Pearson correlation values are given to confirm if the signals colocalize. The next columns show the same  
 271 analysis for yeast ENTH2, human EPN1 ENTH and human EPN3 ENTH respectively. (D) Quantification  
 272 (left panel; box center line, median; box limits, upper and lower quartiles; whiskers, 1.5x IQR; crosses,  
 273 outliers) by fluorescence microscopy of FM4-64 dye uptake in cells for strains that overexpress fusions of



274 either Sla1 PLD or Sup35 NM(Qs) to the N-terminal region of yeast Ent1 (ENTH1) or Ent2 (ENTH2)  
275 proteins or human EPN1 (ENTH) proteins (n = 100 cells; two-sided t-test; see Methods). Presence of  
276 cognate PLD (1) or non-cognate PLD (0) fused to either Ent1 or Sla1 are the input variables in the truth  
277 table (right panel). Measures of colocalization and CME levels for ENTH1 Sla1 PLD (green) confirm the  
278 hypothesis (*H1*) (blue) that transient PLD interactions drive condensation of coat proteins. See also Figure  
279 S3.

280  
281 We observed that ENTH1 and ENTH2 domains of Ent1 and Ent2 proteins, respectively fused to  
282 either Sla1 PLD or Sup35 NM(Q) localized into- and matured with endocytic condensates (as  
283 visualized with Sla1-mCherry) (Figure 3B-C). Absence of colocalization for the other chimeric  
284 Epsins suggests that a limited degree of sequence divergence is tolerated for ENTH domains fused  
285 to artificial or non-cognate PLDs to partition into endocytic condensates (Figure 3C). Note that  
286 Sla1 PLD did, while all Sup35 NM variants did not partition with endocytic condensates on their  
287 own (Figure S3E-F). We also observed that the human Epsin homologs EPN1/3 share conserved  
288 patterns of disorder with yeast Epsin proteins Ent1/2 (Figure 3C) and thus, we tested whether they  
289 would partition with endocytic condensates. We engineered chimeric proteins of EPN1/3 in which  
290 their low complexity domains (LCDs) were replaced with either Sla1 PLD or sequence variants of  
291 Sup35 NM. Although EPN1 and EPN3 *wildtype* and chimeric constructs all formed foci in yeast  
292 cells, only the chimeric EPN1 ENTH fused to the Sla1 PLD localized into- and matured with  
293 endocytic condensates (Figure 3C and Figure S3G-I).

294  
295 We next tested whether the chimeric Epsins could function by measuring FM4-64 dye uptake in  
296 *ENT1Δ* cells (Figure 3D). Only Ent1 ENTH1 domain fused to Sla1 PLD colocalized with  
297 endocytic condensates and resulted in recovery of endocytic activity. In controls, we observed no  
298 function rescue by other Sla1 PLD fusions (Figure 3D). Thus, we propose that this result is the  
299 “exception that disproves the rule” that formation of an obligate protein-protein interaction  
300 network by Sla1-PLD is essential for endocytosis to occur. We propose that cognate PLDs mediate  
301 phase separation of coat proteins into endocytic condensates (Figure 3D). Additional evidence that  
302 goes against the idea that obligate protein-protein interactions underlie coat protein assembly  
303 includes the recent observations that coat proteins assemble without perfect stoichiometry of  
304 components, unlike the clathrin or Arp2/3 actin complexes (Holland and Johnson 2018). Further,  
305 there is no electron micrographic evidence for large protein structures, besides the clathrin mesh,  
306 to support the existence of a structured macromolecular complex made of coat proteins (Sochacki,  
307 Dickey et al. 2017). Even when actin bundles are present on cortical sites, the actin patches do not  
308 have a clear structure and are best described as an active viscoelastic gels (Carlsson and Bayly  
309 2014).

310  
311 We do not mean to imply that the protein-protein interaction network formed in endocytic  
312 condensates is unimportant; evidently it is involved in the regulation of endocytosis. For instance,  
313 all of the interactions of coat proteins with the proteins that nucleate actin polymerization are  
314 absolutely essential in actin-dependent endocytosis. Our results suggest that in actin-independent  
315 endocytosis, phase separation into endocytic condensates is essential for endocytosis and that the

316 formation of the endocytic protein-protein interaction network follows specific PLD-dependent  
317 phase separation.

318

319 The observation that the Sup35 NM variants cannot fully complement the Sla1 PLD is consistent  
320 with a recent study that uncovered a “molecular grammar” underlying protein liquid-liquid phase  
321 separation in so-called FUS family proteins (Wang, Choi et al. 2018). The valency i.e., the numbers  
322 of Tyr and Arg residues were shown to be the main determinants of the driving forces for phase  
323 separation of FUS family proteins, likely through direct interaction with each other. The authors  
324 referred to these residues as “stickers”. The types of residues that are interspersed between Tyr and  
325 Arg appear to determine the material properties of condensates. The authors referred to these as  
326 “spacers”. Wang *et al.* suggest that the identities of stickers and spacers are likely to be governed  
327 by the functions of condensates formed by the IDPs. Indeed, this specificity is manifest in our  
328 results that compare the properties of Sup35 NM(Q) mutant to the PLD of Sla1. The amino acid  
329 composition of Sup35 NM(Q) mutant is similar to that of Sla1 PLD. However, although this  
330 sequence supports phase separation of the chimeria ENTH1::Sup35 NM(Q), it could not support  
331 endocytosis (Figure 3C-D). Thus it appears that the PLD sequence of Sla1 and those of other PLD-  
332 containing proteins are evolutionarily optimized to enable the formation of endocytic condensates  
333 with properties that will give the resulting condensate the properties optimal to drive membrane  
334 invaginations.

335

336 Taken together, the totality of our results support the hypothesis that the cortical bodies we study  
337 here are phase-separated viscoelastic condensates. We next determined the material properties of  
338 the endocytic condensates and tested our postulate that their interactions with the plasma  
339 membrane generates the force that drives invagination of the membrane.

340

341 **Interfacial interactions of endocytic condensates cause deformation of the cytosol and**  
342 **membrane**

343

344 We hypothesized that free energy released by endocytic condensate phase separation is converted  
345 into mechanical work to deform the membrane and the cytosol. This mechanical work is  
346 manifested as an inward pressure on the membrane created by expansion of the condensate with  
347 the requirement that volume of the condensate is conserved. Phenomena in which geometric  
348 organization of matter is driven by the balances of opposing forces have been described for a range  
349 of length scales and examples of these include “fingering instabilities” (Kull 1991, Hester 2008,  
350 Xi, Byrnes et al. 2017).

351

352 The mechanics of CME can be described by analogy to a soft viscoelastic and sticky balloon bound  
353 to a soft elastic sheet (Movie S2). If you were to press your finger into the center of the sheet-  
354 balloon interface to create an invagination, the surface area of the balloon would have to increase  
355 to maintain a constant volume and density of the balloon. Equally, if you were to grasp the sticky

356 surface of the balloon with your hands and pull outwards equally over the surface, except at the  
357 elastic sheet-balloon interface, a tiny increase of the surface area would require a compensating  
358 adjustment of the shape so that the balloon would maintain a constant volume. Since force would  
359 be applied outwards everywhere except at the sheet balloon interface, it is there that an  
360 invagination of the membrane-balloon interface would compensate for the pressure generated by  
361 the outward force on the balloon surface.

362

363 In the case of CME, the grasping force is caused by interactions of molecules at the endocytic  
364 condensate-cytoplasm interface. Balance between this binding and elastic/surface deformation  
365 energies is achieved when the membrane invaginates. This idea is captured in a simple  
366 phenomenological model expressed as the sum of mechanical strain energy ( $\phi$  term) and work ( $\psi$   
367 term), respectively;

368

$$369 \quad U = \phi \cdot \delta^{1+\varepsilon} - \psi \cdot \delta ; \quad (1)$$

370

371 Here,  $U$  is a mean-field energy,  $\delta$  is the invagination depth of both the membrane and cytosol  
372 (which are coupled by virtue of conservation of volume of the condensate), and the exponent  $\varepsilon >$   
373  $0$  is determined by the deformation geometry (Methods). At equilibrium  $\partial U/\partial \delta = 0$  and we expect  
374 invagination to balance the two contributions such that  $\delta^*$  minimizes energy in (1) resulting in,

375

$$376 \quad \delta^* = \left( \frac{\psi}{\phi (1 + \varepsilon)} \right)^{\frac{1}{\varepsilon}} ; \quad (2)$$

377

378 Equation (2) shows that the invagination depth  $\delta$  is determined by the ratio  $\psi/\phi$  and the deformation  
379 geometry  $\varepsilon$ . To determine the numerical values of  $\phi$  and  $\psi$  with mechanical contact theory, we  
380 must estimate the geometries of the condensate, the viscoelastic properties of the cytosol, the  
381 condensate and the membrane and from these values, determine the interfacial tensions among  
382 them (Methods).

383

### 384 **Endocytic condensates are embedded in a viscoelastic cytosol**

385

386 We used active rheology to measure the material properties of the cytosol in which endocytic  
387 condensates are embedded. We then calculated the condensate properties based on Hertz theory,  
388 which directly relates the material properties of one elastic material to that of an embedded elastic  
389 object, based on the deformation geometry, as described below. Specifically, we used optical  
390 tweezers to examine the frequency-dependent amplitude and phase responses of polystyrene beads  
391 embedded in cells (Figure 4A and Methods). Polystyrene beads of 200 nm diameter were  
392 integrated into cells by osmoporation (Figure S4A-B). Measurements of passive diffusion of the  
393 beads showed mean square displacements (MSD) close to that of random mechanical noise caused

394 by vibration of the microscope (Figure S4C). Furthermore, we established that the osmoporation  
 395 procedure did not affect rheological properties of cells by measuring the MSD of expressed viral  
 396 capsid microNS particles labeled with GFP in untreated or osmoporated cells and showing that  
 397 their diffusion behaviors were identical (Figure S4D-F) (Munder, Midtvedt et al. 2016).  
 398

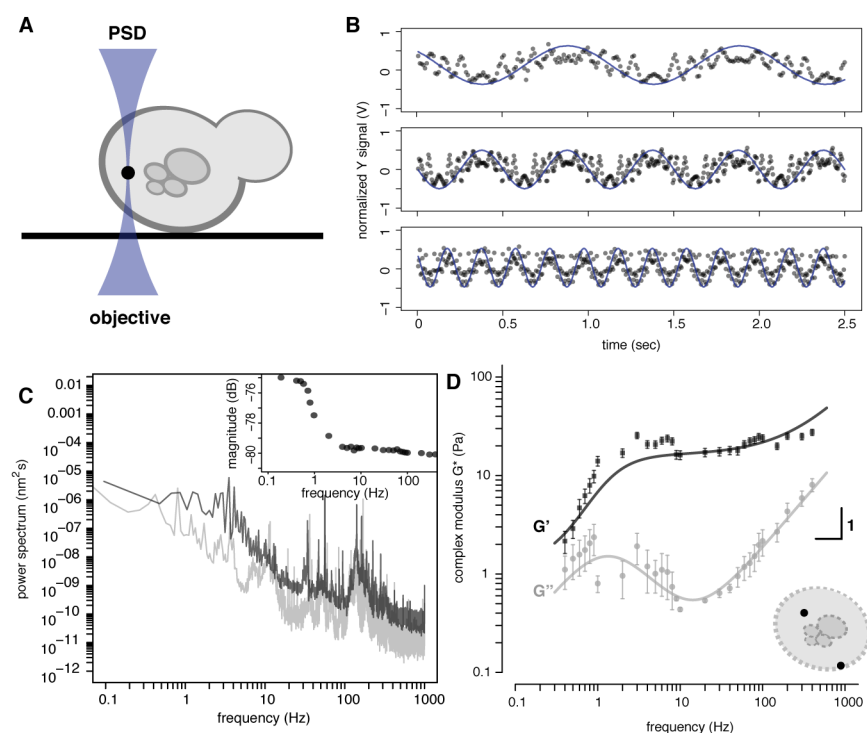

399  
 400  
 401 **Figure 4 | Yeast cytosol is composed of a viscoelastic network of interacting proteins** (A) We used  
 402 optical tweezers (beam between the microscope objective and a position sensitive detector (PSD) coupled  
 403 to an acousto-optic device (AOD) to oscillate polystyrene beads in cells. Two pulses of osmotic shock were  
 404 used to osmoporate 200 nm polystyrene beads (black) into Lat A-treated haploid yeast *GPD1Δ* cells. (B)  
 405 PSD output signal in volts (V) as a function of time for acquisitions made at 1Hz (top), 2 Hz (middle) and  
 406 5 Hz (bottom). A bead, located in the cell periphery, was oscillated with the AOD in the Y-axis of the  
 407 specimen plane with fixed tweezer movement amplitude (normalized blue curve) at different frequencies.  
 408 The recorded PSD raw traces (black points) were also normalized to a corresponding magnitude range  
 409 (coherence cutoff of 0.9). (C) Power spectrum of the oscillated bead (black) with magnitude of response as  
 410 a function of frequency (insert). (D) Decomposition of  $G^*$  as a function of frequency into  $G'$  (storage  
 411 modulus; darker squares) and  $G''$  (loss modulus; light shade circles) for beads distributed at both the cell  
 412 periphery and interior (see schematic insert; mean  $\pm$  sd;  $n = 17$  cells) with an average trap stiffness  $k_{\text{trap}}$  (mean  
 413  $\pm$  se;  $8.0 \times 10^5 \pm 2.7 \times 10^5 \text{ N m}^{-1}$ ) and photodiode sensitivity factor  $\beta$  (mean  $\pm$  se;  $10.7 \times 10^3 \pm 2.3 \times 10^3 \text{ nm}$   
 414  $\text{V}^{-1}$ ). Data was fitted to a model of an entangled and crosslinked network of flexible polymers (Methods;  
 415 Eq. 2.9-2.10). See also Figure S4.  
 416

417 For active rheology experiments, we used an acousto-optic device to oscillate the position of the  
 418 optical trap in the specimen plane at frequencies over four orders of magnitude and measured the  
 419 displacement of trapped beads from the trap center using back focal plane interferometry (Figure  
 420 4B). We thus measured the viscoelastic properties of the cytosol surrounding the beads by

421 measuring the phase and amplitude of displacements of beads in response to the oscillations of the  
422 optical tweezers. Then, by calculating the power spectrum of unforced fluctuations of the bead,  
423 we obtained storage ( $G'$ ) and loss ( $G''$ ) moduli as a function of frequency (Figure 4C-D, S4G-H  
424 and Methods) (Hendricks and Goldman 2017).

425  
426 Cells and underlying structures show different mechanical properties depending on the rates at  
427 which forces are applied to them (Hendricks, Holzbaur et al. 2012, Guo, Ehrlicher et al. 2013,  
428 Guo, Ehrlicher et al. 2014). If a force is applied at a low velocity, the cell behaves like a viscous  
429 fluid, flowing and taking on whatever shape it is forced into. When a force is applied at higher  
430 velocity the material behaves like an elastic object, bouncing back to its original shape. As we  
431 discuss below, these behaviors reflect the manner and strengths with which the molecules of the  
432 material interact with each other and their environment.

433  
434 The material properties of the yeast cytoplasm and its interactions with the endocytic condensate  
435 derive from the complex modulus *versus* frequency plot as follows (Figure 4D). When deformed  
436 by the condensate growth (at a velocity of growth =  $2360 \pm 120$  nm s<sup>-1</sup>; corresponding to a stress  
437 at  $\sim 30 \pm 2$  Hz) the cytosol is elastic; membrane invagination occurs at a rate (a velocity of  $7.4 \pm$   
438  $2.5$  nm s<sup>-1</sup>; corresponding to  $0.1 \pm 0.04$  Hz) at which the cytoplasm is viscoelastic and very  
439 compliant (Figure 4D and S4I-J). The  $G'$  and  $G''$  we measured here in yeast are similar to those of  
440 the cytoplasm of adherent mammalian cells (Hendricks, Holzbaur et al. 2012, Guo, Ehrlicher et al.  
441 2013, Guo, Ehrlicher et al. 2014).

442  
443 The material properties of the endocytic condensate were calculated using its geometric  
444 dimensions (Figure 1B) and the material properties of the cytosol (Figure 4). As noted above,  
445 classic Hertz theory relates contact geometries of elastic materials to their respective mechanical  
446 properties. Therefore, we used the geometry of the endocytic condensates determined in our super-  
447 resolution fluorescence imaging experiments and the moduli of the cytosol in which they are  
448 embedded to estimate the endocytic condensate elastic modulus which was 59 Pa (Figure 1B, 4D,  
449 and Methods; Eq. 3.7-3.10) (Hertz 1882). These results are consistent with protein condensates  
450 that form elastic materials (Reichheld, Muiznieks et al. 2017) and suggests that endocytic  
451 condensates have similar material properties as the surrounding cytosol, which has an elastic  
452 modulus of 45 Pa at 1 Hz (Methods).

453  
454 **PLD-containing coat proteins form a dense network of interacting molecules**

455  
456 We estimated the average mesh size and permeability of the endocytic condensates by probing  
457 them with fluorophore-conjugated dextran molecules of 2.4, 5.8, and 10.4 nm in diameter. We  
458 measured FRAP and colocalization of these dextran molecules with either Sla1-mCherry or Syp1-  
459 mCherry puncta (Figure 5 and S5). Although the density of 5.8 nm dextran-FITC is lower in Sla1  
460 puncta than in the surrounding cytosol, the mobility of the 5.8 nm probe is equal in both regions

461 (Figure 5A and S5B-D). We observed that both 2.4 nm and 5.8 nm dextran-FITC recovered equally  
462 well in the condensate and cytosolic zones (Figure 5A and S5F). In contrast, few 10.4 nm dextran-  
463 FITC molecules permeate the PLD-rich protein network in the condensate, whereas they are  
464 mobile in the neighboring cytosol (Figure 4B). When endocytic condensates are disrupted by  
465 addition of 1,6-hexanediol, we observe equivalent mobility of 10.4 nm dextran-FITC between  
466 cortical sites, labelled with the protein Syp1-mCherry, which is membrane-bound at cortical  
467 patches in an HD-resistant manner, and neighboring cytosol (Figure 5 and S5E). These results are  
468 consistent with an exclusion zone for ribosomes as discussed above and with exclusion of dextrans  
469 by known protein-RNA phase separated condensates called P granules (Updike, Hachey et al.  
470 2011, Wei, Elbaum-Garfinkle et al. 2017).  
471

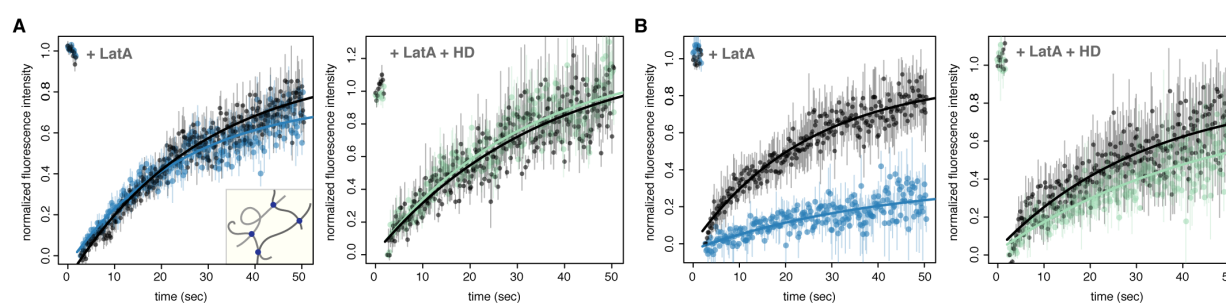

472  
473

474 **Figure 5 | Porous meshwork structure of endocytic condensates is less permeable than cytosol (A)**  
475 Fluorescence recovery after photobleaching (FRAP) of dextran-FITC probes within endocytic condensates  
476 or neighbouring cytosol regions of interest. FRAP of the bleached 5.8 nm dextran-FITC within either a  
477 Sla1-mCherry (left panel; Lat A treated cells; blue) or a Syp1-mCherry (right panel; Lat A and 5% HD  
478 treated cells; green) puncta and neighbouring cytosol regions (black) without Sla1 or Syp1 signals  
479 respectively. Insert is an illustration of a porous latticework composed of amorphous protein chains (grey  
480 filaments) with binding sites (dots) through which they are non-covalently associated. (B) Same experiment  
481 with 10.4 nm dextran-FITC that scarcely permeate the Sla1 puncta (left panel; Lat A treated cells; blue) but  
482 are mobile when condensates are dissolved by HD (right panel; Lat A and 5% HD treated cells; green).  
483 Data points (mean ± SEM; n = 10 cells) were fitted to a single term recovery function (Methods). See also  
484 Figure S4.

485

486 **Interactions of endocytic condensates with cytosol and membrane provide the required**  
487 **energy to drive membrane invagination**

488

489 The deformation of the membrane in response to contact with a soft object depends on the  
490 geometries and mechanical properties of the object and the vessel it is in (in our case the cytosol  
491 of a cell) and the membrane (Figure 6A). Evidence from electron and super-resolution  
492 fluorescence microscopy indicates that the favored geometry of the membrane is flat with an  
493 invagination centered in the middle of the condensate (Figure 6A, lower). Such geometries are  
494 explained by a local radial stress-gradient generated by the condensate adhesion to both the  
495 membrane and cytosol or by local binding of adaptor proteins and distinct lipid compositions.

496 Simply stated, as the condensate grows, the interactions to the cytosol draws it inward and the  
 497 membrane follows, mediated by its own interactions to the condensate and the requirement that  
 498 the volume of the condensate be conserved.  
 499

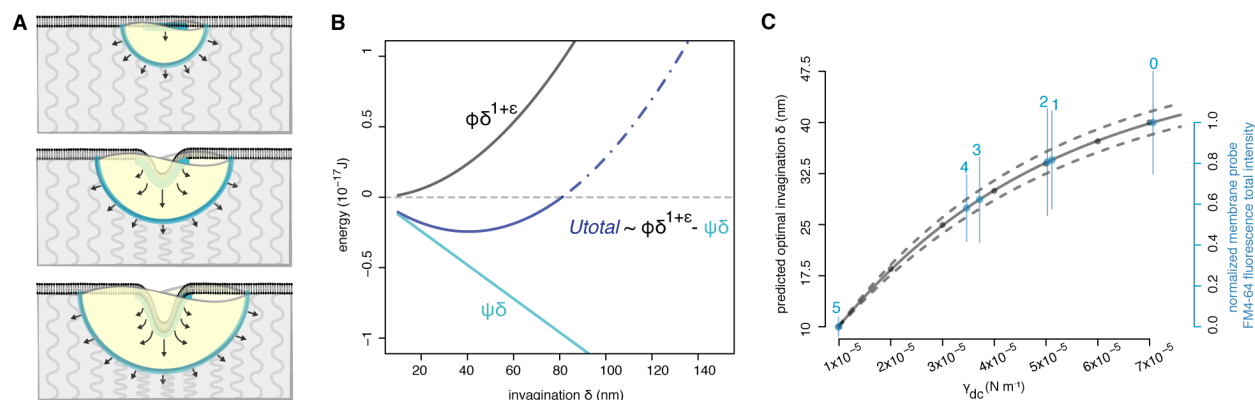

500  
 501  
**502 Figure 6. Endocytic condensates do mechanical work to deform the membrane and cytosol (A)**  
 503 Illustration of a endocytic condensate (yellow) that binds to (wets) a bilayer membrane (black) and drives  
 504 membrane invagination (top to bottom). Resultant membrane deformations reflect how forces balance  
 505 under a Young-Dupré adhesion gradient (blue lines and arrows). Resistance to deformation is represented  
 506 by grey curved lines. (B) Equation (1) (insert) was used to calculate the energy penalties ( $\phi$ ) and  
 507 contributions ( $\psi$ ) at the cytosol and membrane interfaces with the endocytic condensate. Total energy of  
 508 the system (dark blue), energy penalties (black) and energy contributions (light blue) are presented as a  
 509 function of membrane invagination ( $\delta$ ). The energy of membrane invagination is favourable for  $\delta$  between  
 510 about 15-80 nm (solid blue line) and unfavorable above 80 nm (dashed blue line). Quantities used to  
 511 calculate energies are detailed in Figure S5, Table S3 and S4. (C) Our model predicts that vesicle size is  
 512 proportional to the strength of condensate intermolecular protein-protein interactions that are proportional  
 513 to  $\gamma_{dc}$ , the condensate-to-cytosol interfacial tension. Predicted membrane invagination  $\delta$  as a function of  $\gamma_{dc}$   
 514 (left axis and black points). Data points were fitted to an exponential decay function (full line) with 95%  
 515 confidence interval (dashed lines). Titration of 1,6-hexanediol was used to reduce intermolecular cohesion  
 516 and therefore  $\gamma_{dc}$  resulting in reduced vesicle size as measured by uptake of the lipophilic membrane probe  
 517 FM4-64 into *GPD1Δ Sla1-YFP* cells treated with Lat A (Right axis, red) versus % HD (blue numbers, n=  
 518 25, mean  $\pm$  sd) expressed as a function of the condensate-cytosol interfacial tension  $\gamma_{dc}$  (Methods). See also  
 519 Figure S5.

520  
 521 We quantified the work performed by the condensate to invaginate the membrane using the storage  
 522 and loss moduli obtained from the micro-rheology experiments, geometric data obtained from  
 523 super-resolution imaging, and other data available from the literature. We used these values to  
 524 solve the explicit form of the  $\phi$  and  $\psi$  terms (mechanical strain and work, respectively) in Equation  
 525 (1) as functions of membrane and cytosol invagination  $\delta$  (Methods; Eq. 4.25-4.26). Using the  
 526 Young-Laplace equation, we first estimated an interfacial tension for the condensate-cytosol  
 527 interface to be approximately  $\gamma_{dc}$  of  $7 \times 10^5 \text{ N}\cdot\text{m}^{-1}$ . This estimate is based on the pressure difference  
 528 across the cytosolic interface and the condensate mean curvature (Methods; Eq. 4.6). Our estimate  
 529 for the interfacial tension falls within the range of values that have been reported for other protein

530 condensates, including nucleoli and P granules (Methods; Eq. 4.9) (Brangwynne, Mitchison et al.  
531 2011, Elbaum-Garfinkle, Kim et al. 2015).

532

533 Given our estimates of  $\gamma_{dc}$ , we also determined the work of adhesion released when the condensate  
534 surfaces are created, as described by the Young-Dupré equation (Figure 6 and Methods; Eq. 4.11).

535 We calculated an adhesion energy ( $\psi$ ) of  $4.9 \times 10^{-18}$ J from interactions between the endocytic  
536 condensate and both the membrane and cytosol (Figure 6B, S6 and Methods; Eq. 4.26). Our results

537 suggest that the most significant contribution of the mechanical energy comes from the  
538 condensate-cytosol interface, where the adhesion energy of  $2.9 \times 10^{-18}$ J is enough to overcome an

539 energy penalty of  $2.4 \times 10^{-18}$ J to deform the membrane and the cytosol. This energy cost includes  
540 the elastic, viscous, and interfacial stress penalties (Figure 6B, S6 and Table S4). We also

541 calculated an average adhesion energy of  $1.3 \text{ kJ}\cdot\text{mol}^{-1}$  at the condensate-cytosol interface  
542 (Methods), which is consistent with the free energies expected of non-covalent interactions

543 (Mahadevi and Sastry 2016).

544

545 Our model provides a physical framework to explain how endocytic condensates exert force to  
546 induce invagination of membranes in actin-independent CME in our mutant yeast cells. The

547 interface between condensates, formed by phase separation of disordered proteins into cortical  
548 bodies, and the cytosol or membrane deforms the surrounding materials through adhesive

549 interactions. Invagination occurs when  $\psi$  dominates  $\phi$  in Equation (1) and is favored within the  
550 observed  $\delta$  interval of 40 nm to 80 nm (Figure S6). Notably, this predicted  $\delta$  interval is within the

551 range of plasma membrane invagination of 70 nm or more, at which point membrane constriction  
552 and vesicle scission mechanisms are activated to complete CME (Idrissi, Blasco et al. 2012).

553

#### 554 **Condensate cohesion and interfacial tension determines the potential energy**

555

556 We propose that endocytic condensates store and dissipate mechanical energy in the form of  
557 interfacial tension, whereby the composition of the condensates determine their interfacial

558 interactions, and provides the energy for adhesion and invagination of membranes. Accordingly,  
559 the underlying energy stored within the condensates and the balance of interactions amongst

560 condensate components and solvent governs the interface. The effective potential energy  $\psi$  of  
561 condensates, which is equivalent to the total work of adhesion, should be dictated by the density

562 and strengths of physical interactions amongst proteins within the condensate (the condensate  
563 cohesion and interfacial tensions). We tested this hypothesis by using 1,6-hexanediol (HD) to

564 weaken the favorable free energies of the protein-protein interactions within condensates. These  
565 interactions drive the phase separation of endocytic condensates, and HD titration would

566 correspond to a decrease of the condensate surface tension ( $\gamma_{dc}$  or  $\psi$ ). Our model predicts that  
567 invagination depth should vary continuously with  $\psi$  - Equation (2). We titrated HD below the

568 effective concentration that prevents protein phase separation and quantified individual membrane  
569 excision events by measuring the uptake of the lipophilic membrane probe FM4-64 into cells by



570 fluorescence microscopy (Figure 2A and Methods). In Lat A treated *GPD1Δ* cells, our  
571 measurement reports the amount of labeled membrane taken up into cells under the action of  
572 endocytic condensates alone. By increasing subcritical HD concentration (corresponding to a  
573 decrease in  $\psi$ ), the average fluorescence-labeled membrane per vesicle (a proxy for invagination  
574  $\delta$ ) was continuously reduced over one order of magnitude in the value of  $\gamma_{dc}$  (Figure 6C and  
575 Methods; Eq. 2.8). This observation fits with the reduced membrane invagination that we predicted  
576 at the outset (*i.e.*, that  $\delta$  scales with the  $\psi/\phi$  ratio) when the condensate cohesion ( $\gamma_{dc}$  or  $\psi$ ) is also  
577 reduced (Figure 6C and Methods; Eq. 4.2).

578

## 579 Discussion

### 580 Existing models of actin-independent CME are implicit to our viscoelastic protein 581 condensate model

582

583 In the context of actin-independent CME in *S. cerevisiae*, we estimated that approximately  $9.7 \times$   
584  $10^{-18}$  J of energy is required to produce an 80 nm deep membrane invagination. We have also  
585 estimated that protein condensate formation generates  $4.9 \times 10^{-18}$  J to reach the energy minima  
586 (Figure 6C and Table S4). This suggests that other curvature-generating mechanisms must provide  
587 the energy balance to maintain or increase the profundity of the energy minimum in our model.  
588 Several proposed mechanisms could provide significant sources of energy to account for this  
589 deficit; such mechanisms may also depend on formation of the endocytic condensates. These  
590 include (1), membrane curvature-inducing proteins and protein complexes, including convex-  
591 shaped BAR (for Bin, Amphiphysin and Rvs) domain-containing proteins (Youn, Friesen et al.  
592 2010, Yu and Schulten), (2), insertion of amphipathic protein helix into membrane (Ford, Mills et  
593 al. 2002, Boucrot, Pick et al. 2012)(3), local relief of turgor pressure (Scher-Zagier and Carlsson  
594 2016), (4), proteins that modulate lipid composition (Graham and Kozlov 2010, Anitei, Stange et  
595 al. 2017) or (5), steric exclusion or crowding of proteins at cortical sites (Snead, Hayden et al.  
596 2017). A counterargument to the latter point (5) is that calculations of the entropic gain and  
597 pressure produced in the crowded protein layer, obtained with the Carnahan-Starling equation  
598 which assumes that proteins are non-attracting (non-interacting) disks (Derganc and Copic 2016),  
599 are not compatible with the interaction energies that we estimate to account for cohesion among  
600 the condensate-forming proteins or adhesion at membrane and cytosol interfaces with the  
601 condensate.

602

603 It is possible that most of these mechanisms have an additive effect *in vivo* and are integrated with  
604 the condensate-based mechanism we introduce here to drive actin-independent CME. Binding of  
605 Epsins (Ent1 and Ent2 proteins in yeast), in particular, has been proposed to facilitate deformation  
606 of membranes by insertion of an amphipathic helix into the outer leaflet of the bilayer, which  
607 pushes the head groups apart (Ford, Mills et al. 2002, Boucrot, Pick et al. 2012, Skruzny, Desfosses  
608 et al. 2015). ENTH-containing Epsin proteins are also reported to reduce membrane tension of  
609 artificial giant vesicles, thus facilitating deformation and curvature of the membrane (Gleisner,

610 Kroppen et al. 2016). By reducing the effective resistance of membrane elasticity, Epsin-  
611 membrane interactions could shift right and increase the profundity of the energy minimum in our  
612 model. At the same time, for these mechanisms to work, the proteins must be concentrated at  
613 endocytic sites, a function served by their phase separation with the condensate.

614

### 615 **Implications of endocytic condensates to other emergent phenomena**

616

617 Our results provide a framework for answering many questions regarding CME and other  
618 membrane budding processes. For example, given our observations, how is CME coupled to  
619 signaling pathways that regulate vesicle formation? The PLD-containing CME proteins we  
620 investigated are enriched for multiple phosphorylation sites, which undergo changes in response  
621 to activation of a CME-regulating signaling pathway (Kanshin, Bergeron-Sandoval et al. 2015).  
622 Since the amount and distribution of charge in disordered regions of proteins regulate their  
623 interactions and conformations (Das and Pappu 2013), such post-translational modifications may  
624 be important to regulating phase separation and material properties of CME condensates (Miao,  
625 Tipakornsaowapak et al. 2018).

626

627 Our fluorescence microscopy and electron micrographic evidence from the literature suggests that  
628 the endocytic condensate remains associated temporarily with mature vesicles (Kukulski, Schorb  
629 et al. 2012). Does the condensate play any role in trafficking and fusing with, for instance, plasma  
630 membrane (protein recycling) or lysosome (protein degradation)? CME also underlies several  
631 fundamental mechanisms of vesicle trafficking and attendant membrane and vesicle protein cargo  
632 transport, including late secretory pathways and neuronal synaptic vesicle recycling in which both  
633 scission of budding vesicles and their re-fusion to other membranes occurs.

634

635 Yeast and human proteins implicated in clathrin-mediated vesicle trafficking are enriched for long  
636 disordered protein domains (47 % of human and 23% of yeast proteins have long consecutive  
637 disordered regions of up to or greater than 30 residues), whereas those involved in two other vesicle  
638 trafficking systems are not (COPI: 8/5%; COPII: 8/5%) (Pietrosemoli, Panca et al. 2013). These  
639 observations argue for investigating the generality and conservation of protein condensate  
640 adhesion-driven membrane invagination as an underlying source of energy in clathrin-mediated  
641 vesicle trafficking in the absence of actin polymerization.

642

643 Recent evidence suggests that neurodegenerative pathologies, such as Amyotrophic lateral  
644 sclerosis, Huntington's and Alzheimer's, may result from both aberrant liquid-liquid phase  
645 separation of proteins and disruption of endocytosis (Bhattacharyya, Banerjee et al. 2008, Wu and  
646 Yao 2009, G. Liu, A.N. Coyne et al. 2017). In future work, it will be interesting to observe whether  
647 adherent liquid-liquid phase separation of proteins in endocytic condensates contribute to these  
648 pathologies.

649

650 Phase separation of proteins in an elastic network, such as yeast cytosol, is predicted to restrain  
651 the size of condensates because condensates have a limited mechanical potential to deform the  
652 cytosol in order to grow beyond the cytosol mesh size (Style, Sai et al. 2018). Our results suggest  
653 that, beyond deformation of cellular structures, the material properties of the cytosol and the  
654 interactions amongst proteins within the condensate can also dictate the dimensions of biopolymer  
655 condensates found in cells.

656

657 Finally, it is possible that other liquid-liquid phase separated protein and protein nucleic acid  
658 condensates influence cellular sub-structural dynamics and thus contribute to shaping cell, tissue,  
659 and organism morphology (Bergeron-Sandoval, Safaee et al. 2016, Bauerlein, Saha et al. 2017,  
660 Bergeron-Sandoval and Michnick 2018, Style, Sai et al. 2018). More broadly, interfacial contact  
661 potentials between different biological materials may represent a vastly underestimated source of  
662 complex pattern formation in biology, such as has been observed in embryonic tissue layers (Foty,  
663 Pflieger et al. 1996), in a model of growing brain convolutions (Tallinen, Chung et al. 2016), in  
664 protein stabilization (Gupta, Donlan et al. 2017) and in the ability of clathrin-coated structures to  
665 wrap around and pinch collagen fibers (Elkhatib, Bresteau et al. 2017).

## 666 **Acknowledgements**

667 The authors acknowledge support from CIHR grants MOP-GMX-152556 (SWM), the US  
668 National Institutes of Health grant R01NS056114 (RVP), the Fonds Québécois de la Recherche  
669 sur la Nature et les Technologies (SWM and PF) and the Human Frontier Science Program  
670 RGP0034/2017 (SWM and RVP). CEC was supported by the National Institute of General  
671 Medical Sciences of the National Institutes of Health (NIH) under award T32GM008268. Research  
672 in the Keller Lab is supported by National Science Foundation award MCB-1402059 to SLK. We  
673 thank Cliff Brangwynne, David Drubin, Tom Pollard and Julien Berro for thoughtful discussion  
674 and advice on the manuscript; Jackie Vogel for strains; Susan Liebman and Randal Halfmann for  
675 plasmids; Jacqueline Kowarzyk and Philippe Garneau for technical assistance and Rosa Kaviani  
676 for help with FRAP experiments.

677

## 678 **Author Contributions**

679 LPBS and SWM designed the research with the assistance of RVP; LPBS performed biological  
680 research; LPBS, AJE, RVP and SWM analysed the biological data; CC, CEC and SLK performed  
681 and analysed the vesicle leakage experiments; LPBS and HKH performed micro rheology  
682 experiments; LPBS, HKH, AJE and AGH analysed micro rheology data; LPBS, HKH and PF  
683 developed physical model; LPBS and SWM wrote the first version, all authors corrected the paper.

684

## 685 **Supplementary Materials**

686 Materials and Methods

687 Figures S1-S6

688 Tables S1-S4

689 Movies S1-S2

## 690 References

- 691 1. Aghamohammadzadeh, S. and K. R. Ayscough (2009). "Differential requirements for actin during yeast and  
692 mammalian endocytosis." *Nat Cell Biol* **11**(8): 1039-1042.
- 693 2. Alberti, S., R. Halfmann, O. King, A. Kapila and S. Lindquist (2009). "A systematic survey identifies prions and  
694 illuminates sequence features of prionogenic proteins." *Cell* **137**(1): 146-158.
- 695 3. Alberti, S., S. Saha, J. B. Woodruff, T. M. Franzmann, J. Wang and A. A. Hyman (2018). "A User's Guide for  
696 Phase Separation Assays with Purified Proteins." *J Mol Biol*.
- 697 4. Anitei, M., C. Stange, C. Czupalla, C. Niehage, K. Schuhmann, P. Sala, A. Czogalla, T. Pursche, U. Coskun, A.  
698 Shevchenko and B. Hoflack (2017). "Spatiotemporal Control of Lipid Conversion, Actin-Based Mechanical  
699 Forces, and Curvature Sensors during Clathrin/AP-1-Coated Vesicle Biogenesis." *Cell Rep* **20**(9): 2087-2099.
- 700 5. Basu, R., E. L. Munteanu and F. Chang (2014). "Role of turgor pressure in endocytosis in fission yeast." *Mol*  
701 *Biol Cell* **25**(5): 679-687.
- 702 6. Bauerlein, F. J. B., I. Saha, A. Mishra, M. Kalemanov, A. Martinez-Sanchez, R. Klein, I. Dudanova, M. S. Hipp,  
703 F. U. Hartl, W. Baumeister and R. Fernandez-Busnadiego (2017). "In Situ Architecture and Cellular Interactions  
704 of PolyQ Inclusions." *Cell* **171**(1): 179-187 e110.
- 705 7. Bergeron-Sandoval, L. P. and S. W. Michnick (2018). "Mechanics, Structure and Function of Biopolymer  
706 Condensates." *J Mol Biol*.
- 707 8. Bergeron-Sandoval, L. P., N. Safae and S. W. Michnick (2016). "Mechanisms and Consequences of  
708 Macromolecular Phase Separation." *Cell* **165**(5): 1067-1079.
- 709 9. Bhattacharyya, N. P., M. Banerjee and P. Majumder (2008). "Huntington's disease: roles of huntingtin-  
710 interacting protein 1 (HIP-1) and its molecular partner HIPPI in the regulation of apoptosis and transcription."  
711 *FEBS J* **275**(17): 4271-4279.
- 712 10. Boeke, D., S. Trautmann, M. Meurer, M. Wachsmuth, C. Godlee, M. Knop and M. Kaksonen (2014).  
713 "Quantification of cytosolic interactions identifies Ed1 oligomers as key organizers of endocytosis." *Mol Syst*  
714 *Biol* **10**: 756.
- 715 11. Boucrot, E., A. Pick, G. Camdere, N. Liska, E. Evergren, H. T. McMahon and M. M. Kozlov (2012). "Membrane  
716 fission is promoted by insertion of amphipathic helices and is restricted by crescent BAR domains." *Cell* **149**(1):  
717 124-136.
- 718 12. Brangwynne, C. P., C. R. Eckmann, D. S. Courson, A. Rybarska, C. Hoegge, J. Gharakhani, F. Julicher and A. A.  
719 Hyman (2009). "Germline P granules are liquid droplets that localize by controlled dissolution/condensation."  
720 *Science* **324**(5935): 1729-1732.
- 721 13. Brangwynne, C. P., T. J. Mitchison and A. A. Hyman (2011). "Active liquid-like behavior of nucleoli determines  
722 their size and shape in *Xenopus laevis* oocytes." *Proc Natl Acad Sci U S A* **108**(11): 4334-4339.
- 723 14. Carlsson, A. E. and P. V. Bayly (2014). "Force generation by endocytic actin patches in budding yeast." *Biophys*  
724 *J* **106**(8): 1596-1606.
- 725 15. Conner, S. D. and S. L. Schmid (2003). "Regulated portals of entry into the cell." *Nature* **422**(6927): 37-44.
- 726 16. Darwin, C. (1859). On the origin of species by means of natural selection, or, The preservation of favoured races  
727 in the struggle for life. London, J. Murray.
- 728 17. Das, R. K. and R. V. Pappu (2013). "Conformations of intrinsically disordered proteins are influenced by linear  
729 sequence distributions of oppositely charged residues." *Proc Natl Acad Sci U S A* **110**(33): 13392-13397.
- 730 18. Derganc, J. and A. Copic (2016). "Membrane bending by protein crowding is affected by protein lateral  
731 confinement." *Biochim Biophys Acta* **1858**(6): 1152-1159.
- 732 19. Elbaum-Garfinkle, S., Y. Kim, K. Szczepaniak, C. C. Chen, C. R. Eckmann, S. Myong and C. P. Brangwynne  
733 (2015). "The disordered P granule protein LAF-1 drives phase separation into droplets with tunable viscosity  
734 and dynamics." *Proc Natl Acad Sci U S A* **112**(23): 7189-7194.
- 735 20. Elkhatib, N., E. Bresteau, F. Baschieri, A. L. Rioja, G. van Niel, S. Vassilopoulos and G. Montagnac (2017).  
736 "Tubular clathrin/AP-2 lattices pinch collagen fibers to support 3D cell migration." *Science* **356**(6343).
- 737 21. Feric, M., N. Vaidya, T. S. Harmon, D. M. Mitrea, L. Zhu, T. M. Richardson, R. W. Kriwacki, R. V. Pappu and  
738 C. P. Brangwynne (2016). "Coexisting Liquid Phases Underlie Nucleolar Subcompartments." *Cell* **165**(7): 1686-  
739 1697.
- 740 22. Ford, M. G., I. G. Mills, B. J. Peter, Y. Vallis, G. J. Praefcke, P. R. Evans and H. T. McMahon (2002). "Curvature  
741 of clathrin-coated pits driven by epsin." *Nature* **419**(6905): 361-366.
- 742 23. Foty, R. A., C. M. Pflieger, G. Forgacs and M. S. Steinberg (1996). "Surface tensions of embryonic tissues predict  
743 their mutual envelopment behavior." *Development* **122**(5): 1611-1620.
- 744 24. G. Liu, A.N. Coyne, F. Pei, S. Vaughan, M. Chung, D. C. Zarnescu and J. R. Buchan (2017). "Endocytosis

- 745 regulates TDP-43 toxicity and turnover." *Nature communications* **8**(2092).
- 746 25. Gleisner, M., B. Kroppen, C. Fricke, N. Teske, T. T. Kliesch, A. Janshoff, M. Meinecke and C. Steinem (2016).
- 747 "Epsin N-terminal Homology Domain (ENTH) Activity as a Function of Membrane Tension." *J Biol Chem*
- 748 **291**(38): 19953-19961.
- 749 26. Graham, T. R. and M. M. Kozlov (2010). "Interplay of proteins and lipids in generating membrane curvature."
- 750 *Curr Opin Cell Biol* **22**(4): 430-436.
- 751 27. Guo, M., A. J. Ehrlicher, M. H. Jensen, M. Renz, J. R. Moore, R. D. Goldman, J. Lippincott-Schwartz, F. C.
- 752 Mackintosh and D. A. Weitz (2014). "Probing the stochastic, motor-driven properties of the cytoplasm using
- 753 force spectrum microscopy." *Cell* **158**(4): 822-832.
- 754 28. Guo, M., A. J. Ehrlicher, S. Mahammad, H. Fabich, M. H. Jensen, J. R. Moore, J. J. Fredberg, R. D. Goldman
- 755 and D. A. Weitz (2013). "The role of vimentin intermediate filaments in cortical and cytoplasmic mechanics."
- 756 *Biophys J* **105**(7): 1562-1568.
- 757 29. Gupta, K., J. A. Donlan, J. T. Hopper, P. Uzdaviny, M. Landreh, W. B. Struwe, D. Drew, A. J. Baldwin, P. J.
- 758 Stansfeld and C. V. Robinson (2017). "The role of interfacial lipids in stabilizing membrane protein oligomers."
- 759 *Nature* **541**(7637): 421-424.
- 760 30. Hendricks, A. G. and Y. E. Goldman (2017). "Measuring Molecular Forces Using Calibrated Optical Tweezers
- 761 in Living Cells." *Methods Mol Biol* **1486**: 537-552.
- 762 31. Hendricks, A. G., E. L. Holzbaur and Y. E. Goldman (2012). "Force measurements on cargoes in living cells
- 763 reveal collective dynamics of microtubule motors." *Proc Natl Acad Sci U S A* **109**(45): 18447-18452.
- 764 32. Hertz, H. R. (1882). *Ueber die Beruehrung elastischer Koerper (On Contact Between Elastic Bodies)*. Leipzig,
- 765 Germany, 1895.
- 766 33. Hester, J. J. (2008). "The Crab Nebula: An astrophysical chimera." *Annual Review of Astronomy and*
- 767 *Astrophysics* **46**: 127-155.
- 768 34. Holland, D. O. and M. E. Johnson (2018). "Stoichiometric balance of protein copy numbers is measurable and
- 769 functionally significant in a protein-protein interaction network for yeast endocytosis." *PLoS Comput Biol* **14**(3):
- 770 e1006022.
- 771 35. Idrissi, F. Z., A. Blasco, A. Espinal and M. I. Geli (2012). "Ultrastructural dynamics of proteins involved in
- 772 endocytic budding." *Proc Natl Acad Sci U S A* **109**(39): E2587-2594.
- 773 36. Kanshin, E., L. P. Bergeron-Sandoval, S. S. Isik, P. Thibault and S. W. Michnick (2015). "A cell-signaling
- 774 network temporally resolves specific versus promiscuous phosphorylation." *Cell Rep* **10**(7): 1202-1214.
- 775 37. Khan, T., T. S. Kandola, J. Wu, S. Venkatesan, E. Ketter, J. J. Lange, A. Rodriguez Gama, A. Box, J. R. Unruh,
- 776 M. Cook and R. Halfmann (2018). "Quantifying Nucleation In Vivo Reveals the Physical Basis of Prion-like
- 777 Phase Behavior." *Mol Cell* **71**(1): 155-168 e157.
- 778 38. Khurana, R., C. Coleman, C. Ionescu-Zanetti, S. A. Carter, V. Krishna, R. K. Grover, R. Roy and S. Singh
- 779 (2005). "Mechanism of thioflavin T binding to amyloid fibrils." *J Struct Biol* **151**(3): 229-238.
- 780 39. Kroschwald, S., S. Maharana, D. Mateju, L. Malinowska, E. Nuske, I. Poser, D. Richter and S. Alberti (2015).
- 781 "Promiscuous interactions and protein disaggregases determine the material state of stress-inducible RNP
- 782 granules." *Elife* **4**: e06807.
- 783 40. Kukulski, W., M. Schorb, M. Kaksonen and J. A. Briggs (2012). "Plasma membrane reshaping during
- 784 endocytosis is revealed by time-resolved electron tomography." *Cell* **150**(3): 508-520.
- 785 41. Kull, H. J. (1991). "Theory of the Rayleigh-Taylor Instability." *Physics Reports-Review Section of Physics*
- 786 *Letters* **206**(5): 197-325.
- 787 42. Li, D., L. Shao, B. C. Chen, X. Zhang, M. Zhang and B. Moses (2015). "Extended-resolution structured
- 788 illumination imaging of endocytic and cytoskeletal dynamics." *Science (New York, NY)*.
- 789 43. Li, X. H., P. L. Chavali, R. Pancsa, S. Chavali and M. M. Babu (2018). "Function and Regulation of Phase-
- 790 Separated Biological Condensates." *Biochemistry*.
- 791 44. Li, Y., R. Lipowsky and R. Dimova (2011). "Membrane nanotubes induced by aqueous phase separation and
- 792 stabilized by spontaneous curvature." *Proc Natl Acad Sci U S A* **108**(12): 4731-4736.
- 793 45. Lin, Y., D. S. W. Protter, M. K. Rosen and R. Parker (2015). "Formation and Maturation of Phase-Separated
- 794 Liquid Droplets by RNA-Binding Proteins." *Molecular Cell* **60**(2): 208-219.
- 795 46. Mahadevi, A. S. and G. N. Sastry (2016). "Cooperativity in Noncovalent Interactions." *Chem Rev* **116**(5): 2775-
- 796 2825.
- 797 47. Malinowska, L., S. Kroschwald and S. Alberti (2013). "Protein disorder, prion propensities, and self-organizing
- 798 macromolecular collectives." *Biochim Biophys Acta* **1834**(5): 918-931.
- 799 48. Miao, Y., T. Tipakornsaowapak, L. Zheng, Y. Mu and E. Lewellyn (2018). "Phospho-regulation of intrinsically
- 800 disordered proteins for actin assembly and endocytosis." *FEBS J*.

- 801 49. Molliex, A., J. Temirov, J. Lee, M. Coughlin, A. P. Kanagaraj, H. J. Kim, T. Mittag and J. P. Taylor (2015).  
802 "Phase separation by low complexity domains promotes stress granule assembly and drives pathological  
803 fibrillization." *Cell* **163**(1): 123-133.
- 804 50. Mukherjee, D., B. G. Coon, D. F. Edwards, 3rd, C. B. Hanna, S. A. Longhi, J. M. McCaffery, B. Wendland, L.  
805 A. Retegui, E. Bi and R. C. Aguilar (2009). "The yeast endocytic protein Epsin 2 functions in a cell-division  
806 signaling pathway." *J Cell Sci* **122**(Pt 14): 2453-2463.
- 807 51. Mund, M., J. A. van der Beek, J. Deschamps, S. Dmitrieff, J. L. Monster, A. Picco, F. Nedelec, M. Kaksonen  
808 and J. Ries (2017). "Systematic analysis of the molecular architecture of endocytosis reveals a nanoscale actin  
809 nucleation template that drives efficient vesicle formation." *bioRxiv*.
- 810 52. Munder, M. C., D. Midtvedt, T. Franzmann, E. Nuske, O. Otto, M. Herbig, E. Ulbricht, P. Muller, A.  
811 Taubenberger, S. Maharana, L. Malinowska, D. Richter, J. Guck, V. Zaburdaev and S. Alberti (2016). "A pH-  
812 driven transition of the cytoplasm from a fluid- to a solid-like state promotes entry into dormancy." *Elife* **5**.
- 813 53. Pappu, R. V., X. Wang, A. Vitalis and S. L. Crick (2008). "A polymer physics perspective on driving forces and  
814 mechanisms for protein aggregation." *Arch Biochem Biophys* **469**(1): 132-141.
- 815 54. Peskett, T. R., F. Rau, J. O'Driscoll, R. Patani, A. R. Lowe and H. R. Saibil (2018). "A Liquid to Solid Phase  
816 Transition Underlying Pathological Huntingtin Exon1 Aggregation." *Mol Cell* **70**(4): 588-601 e586.
- 817 55. Pietrosemoli, N., R. Pancsa and P. Tompa (2013). "Structural disorder provides increased adaptability for vesicle  
818 trafficking pathways." *PLoS Comput Biol* **9**(7): e1003144.
- 819 56. Reichheld, S. E., L. D. Muiznieks, F. W. Keeley and S. Sharpe (2017). "Direct observation of structure and  
820 dynamics during phase separation of an elastomeric protein." *Proc Natl Acad Sci U S A* **114**(22): E4408-E4415.
- 821 57. Scher-Zagier, J. K. and A. E. Carlsson (2016). "Local Turgor Pressure Reduction via Channel Clustering."  
822 *Biophys J* **111**(12): 2747-2756.
- 823 58. Skruzny, M., T. Brach, R. Ciuffa, S. Rybina, M. Wachsmuth and M. Kaksonen (2012). "Molecular basis for  
824 coupling the plasma membrane to the actin cytoskeleton during clathrin-mediated endocytosis." *Proc Natl Acad*  
825 *Sci U S A* **109**(38): E2533-2542.
- 826 59. Skruzny, M., A. Desfosses, S. Prinz, S. O. Dodonova, A. Gieras, C. Uetrecht, A. J. Jakobi, M. Abella, W. J. H.  
827 Hagen, J. Schulz, R. Meijers, V. Rybin, J. A. G. Briggs, C. Sachse and M. Kaksonen (2015). "An Organized Co-  
828 assembly of Clathrin Adaptors Is Essential for Endocytosis." *Developmental Cell* **33**(2): 150-162.
- 829 60. Snead, W. T., C. C. Hayden, A. K. Gadok, C. Zhao, E. M. Lafer, P. Rangamani and J. C. Stachowiak (2017).  
830 "Membrane fission by protein crowding." *Proc Natl Acad Sci U S A* **114**(16): E3258-E3267.
- 831 61. Sochacki, K. A., A. M. Dickey, M. P. Strub and J. W. Taraska (2017). "Endocytic proteins are partitioned at the  
832 edge of the clathrin lattice in mammalian cells." *Nat Cell Biol* **19**(4): 352-361.
- 833 62. Style, R. W., T. Q. Sai, N. Fanelli, M. Ijavi, K. Smith-Mannschott, Q. Xu, L. A. Wilen and E. R. Dufresne (2018).  
834 "Liquid-Liquid Phase Separation in an Elastic Network." *Physical Review X* **8**(1).
- 835 63. Tallinen, T., J. Chung, F. Rousseau, N. Girard, J. Lefèvre and L. Mahadevan (2016). "On the growth and form  
836 of cortical convolutions." *Nature Physics* **12**: 588-593.
- 837 64. Tang, H. Y., J. Xu and M. Cai (2000). "Pan1p, End3p, and Sla1p, three yeast proteins required for normal  
838 cortical actin cytoskeleton organization, associate with each other and play essential roles in cell wall  
839 morphogenesis." *Mol Cell Biol* **20**(1): 12-25.
- 840 65. Thompson, D. A. W. (1917). *On growth and form*. Cambridge Eng., University press.
- 841 66. Toombs, J. A., B. R. McCarty and E. D. Ross (2009). "Compositional Determinants of Prion Formation in Yeast."  
842 *Molecular and Cellular Biology* **30**(1): 319-332.
- 843 67. Updike, D. L., S. J. Hachey, J. Kreher and S. Strome (2011). "P granules extend the nuclear pore complex  
844 environment in the *C. elegans* germ line." *J Cell Biol* **192**(6): 939-948.
- 845 68. Wang, J., J. M. Choi, A. S. Holehouse, H. O. Lee, X. Zhang, M. Jahnel, S. Maharana, R. Lemaitre, A.  
846 Pozniakovsky, D. Drechsel, I. Poser, R. V. Pappu, S. Alberti and A. A. Hyman (2018). "A Molecular Grammar  
847 Governing the Driving Forces for Phase Separation of Prion-like RNA Binding Proteins." *Cell*.
- 848 69. Warren, D. T., P. D. Andrews, C. W. Gourlay and K. R. Ayscough (2002). "Sla1p couples the yeast endocytic  
849 machinery to proteins regulating actin dynamics." *J Cell Sci* **115**(Pt 8): 1703-1715.
- 850 70. Wei, M.-T., S. Elbaum-Garfinkle, A. S. Holehouse, C. C.-H. Chen, M. Feric, C. B. Arnold, R. D. Priestley, R.  
851 V. Pappu and C. P. Brangwynne (2017). "Phase behaviour of disordered proteins underlying low density and  
852 high permeability of liquid organelles." *NATURE CHEMISTRY*.
- 853 71. Weirich, K. L., S. Banerjee, K. Dasbiswas, T. A. Witten, S. Vaikuntanathan and M. L. Gardel (2017). "Liquid  
854 behavior of cross-linked actin bundles." *Proc Natl Acad Sci U S A* **114**(9): 2131-2136.
- 855 72. Wu, F. and P. J. Yao (2009). "Clathrin-mediated endocytosis and Alzheimer's disease: an update." *Ageing Res*  
856 *Rev* **8**(3): 147-149.

- 857 73. Xi, K., T. Byrnes and H. Saito (2017). "Fingering instabilities and pattern formation in a two-component dipolar  
858 Bose-Einstein condensate." [arXiv 1704.04949v1](#)
- 859 74. Youn, J. Y., H. Friesen, T. Kishimoto, W. M. Henne, C. F. Kurat, W. Ye, D. F. Ceccarelli, F. Sicheri, S. D.  
860 Kohlwein, H. T. McMahon and B. J. Andrews (2010). "Dissecting BAR domain function in the yeast  
861 Amphiphysins Rvs161 and Rvs167 during endocytosis." *Mol Biol Cell* **21**(17): 3054-3069.
- 862 75. Yu, H. and K. Schulten (2013). "Membrane sculpting by F-BAR domains studied by molecular dynamics  
863 simulations." *PLoS Comput Biol* **9**(1): e1002892.
- 864
